# Supplementary material for: Development of a Multichannel Organics In situ enviRonmental Analyzer (MOIRA) for mobile measurements of volatile organic compounds
Source: Copernicus journal article supplement (doi:10.5194/egusphere-2023-1479), 2023-08-31
Supplement: Supplementary file 1 [file egusphere-2023-1479-supplement.pdf]

# **Supplemental Information for Development of a Multichannel Organics *In situ* enviRonmental Analyzer (MOIRA) for mobile measurements of volatile organic compounds**

Audrey J. Dang<sup>1</sup>, Nathan M. Kreisberg<sup>2</sup>, Tyler L. Cargill<sup>1</sup>, Jhao-Hong Chen<sup>1</sup>, Sydney Hornitschek<sup>1</sup>,  
5 Remy Hutheesing<sup>1</sup>, Jay R. Turner<sup>1</sup>, Brent J. Williams<sup>1</sup>

<sup>1</sup>Energy, Environmental, and Chemical Engineering, Washington University in St. Louis, St. Louis, 63130, United States

<sup>2</sup>Aerosol Dynamics, Inc., Berkeley, 94710, United States.

*Correspondence to:* Brent J. Williams (brentw@wustl.edu)

S1.1 Vacuum chamber and ceramic interface design

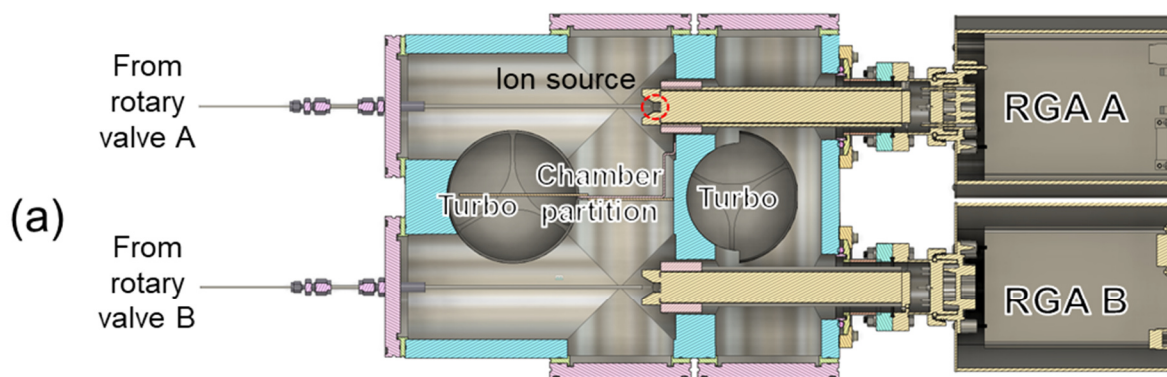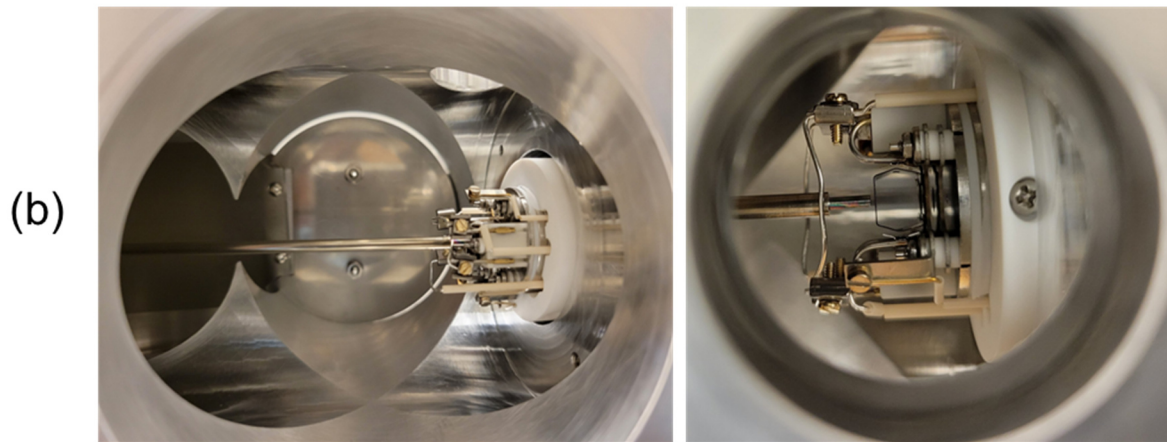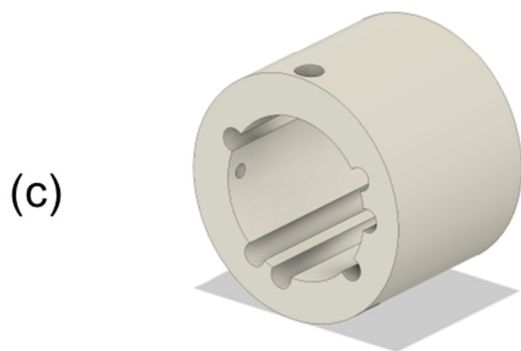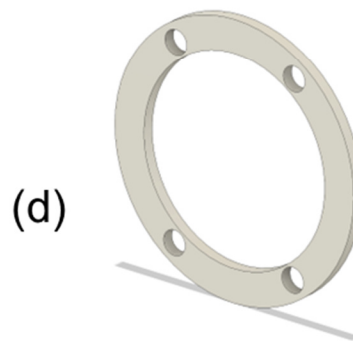

15 Figure S1. (a) Cross-section of vacuum chamber, RGAs, and transfer line from above. (b) Photographs of the interior of the vacuum chamber, RGA source, and ceramic interface from the side. (c) CAD rendering of the ceramic sheath. (d) CAD rendering of the ceramic washer, which is inserted into the RGA source.

## S1.2 Heater Control

The custom LabVIEW program staggers the powering of the 26 heaters, whose duty cycles are proportional to the number of time steps (50 time steps of 20 ms each) for which the heater is powered on during each 1 s control period. In order of greatest to least power (as is typical in bin packing algorithms), the heaters are assigned time steps during which they will be powered on such that the maximum instantaneous total power for all heaters across the 50 time steps is minimized. The algorithm accounts for delays in turning off the heater due to solid state relay delay times.

If the user specifies a maximum instantaneous total heater power, then the LabVIEW program will limit the heating of low priority heated zones if necessary to achieve that threshold. For example, when the instrument is cold after maintenance, power requirements to heat the large number of temperature zones at once to their setpoints can be very large. The maximum power setting is a safeguard to controlling this initial burst of power consumption, which might otherwise exceed the maximum of a typical circuit. In addition, during measurements, the greatest power consumption occurs during the initial 45 seconds of thermal desorption, and heating of less critical zones can be limited in this short period. After the LabVIEW PID controllers calculate the heater duty cycles for the next 1 s control period, the algorithm calculates total heater power for each time step, fractionally decreasing the calculated duty cycles according to user-specified priority until the calculated total heater power is below the specified threshold during all time steps. For example, the rotary valves and GCs have high priority, as operating them below their temperature setpoints could cause component damage or data quality issues, respectively. In contrast, small, temporary decreases in transfer line temperatures are unlikely to cause instrument damage or data quality issues, though very large decreases could degrade sample transfer. To avoid integral wind-up effects and maintain stable control, these decreases in the PID output must be accompanied by a correction to the LabVIEW PID block's "integral error buffer," which is used in the discretized form of the PID algorithm to calculate the integral contribution to the output. In cases where the PID output is modified for power consumption, the integral term is approximated as the difference between the actual, modified output and the proportional term.

To detect anomalies which could indicate an instrument fault, the measured and predicted temperatures are compared for each zone, and a rule set determines whether a heater should be automatically shut-off. The proportionality and time constants of each heated zone are used to predict the temperature response to the duty cycle time series. The temperature prediction is calculated with an exact recursive solution (Eq. (S1)) to Eq. (S2) (Seborg et al., 2010):

$$T(t) = e^{\frac{\Delta t}{\tau_c}} T(k-1) + K \left( 1 - e^{\frac{\Delta t}{\tau_H}} \right) u(k-1) \quad (\text{S1})$$

$$\frac{dT(t)}{dt} + \frac{T(t)}{\tau_c} = \frac{Ku(t)}{\tau_H} \quad (\text{S2})$$

where  $T$  is temperature,  $t$  is time,  $\tau_c$  is the cooling time constant,  $\tau_H$  is the heating time constant,  $u$  is the duty cycle, and  $K$  is the proportional constant. The constants  $K$ ,  $\tau_c$ , and  $\tau_H$  are estimated from the temperature response to a step change in duty cycle. If the predicted temperature is above a certain threshold, or if the predicted increase in temperature deviates from the measured increase in temperature, the heater is shut-off. This prevents heater runaway in cases of inaccurate temperature

measurement. For example, this automated fault detection has prevented instrument damage when a thermocouple fell out  
50 of its slot in a heater block and when an analog voltage amplifier malfunctioned.

## S2 Shadow peaks

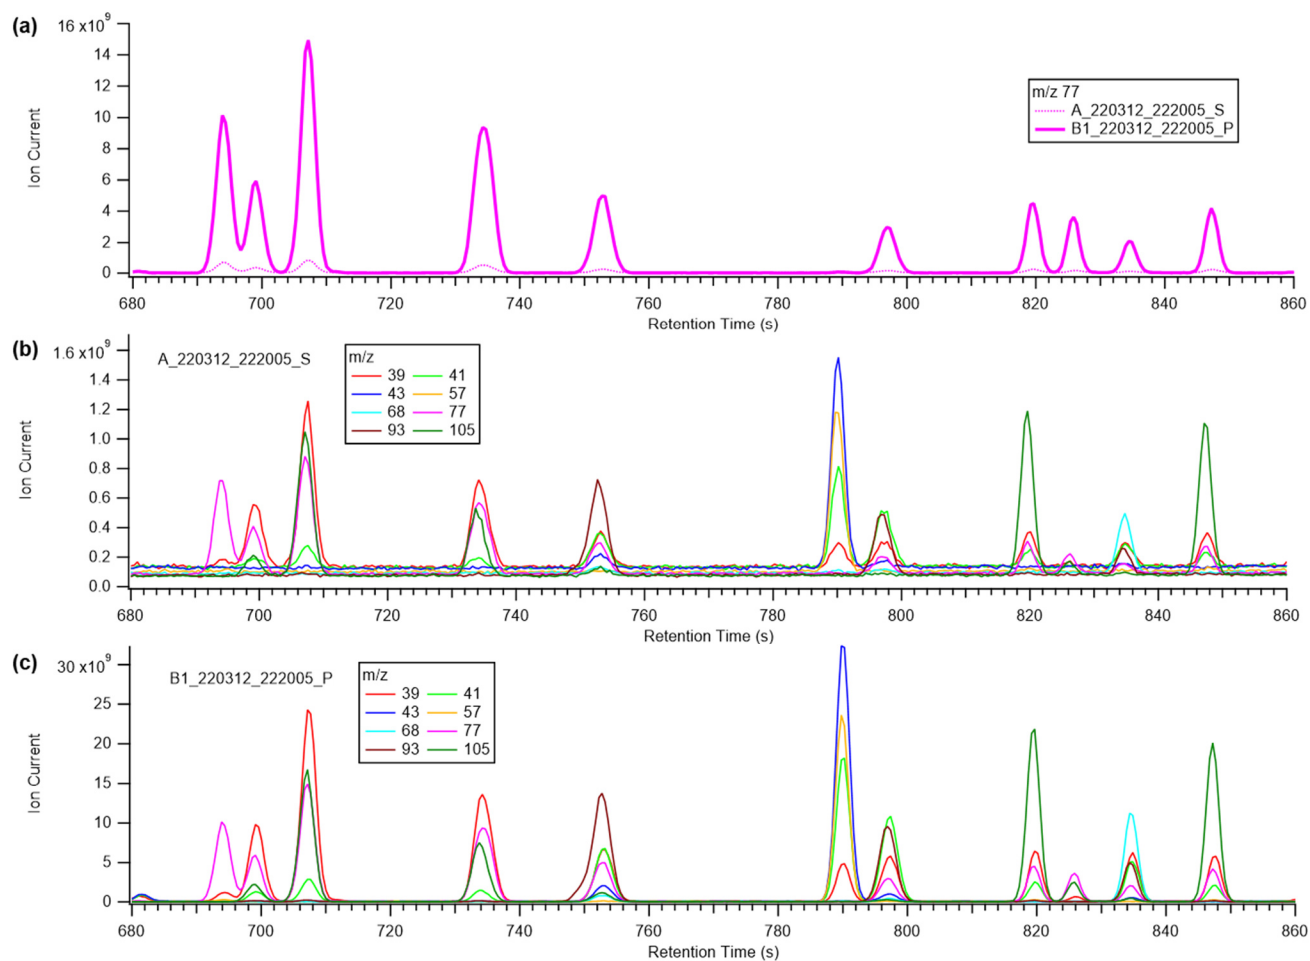

Figure S2. When a calibration standard was analyzed on the prime channel B1, a shadow signal of lesser abundance was  
55 simultaneously detected by RGA A: (a) Overlay of  $m/z$  77 for both RGAs (b) Shadow ion chromatograms for multiple  $m/z$  values  
(c) Prime ion chromatograms for multiple  $m/z$  values



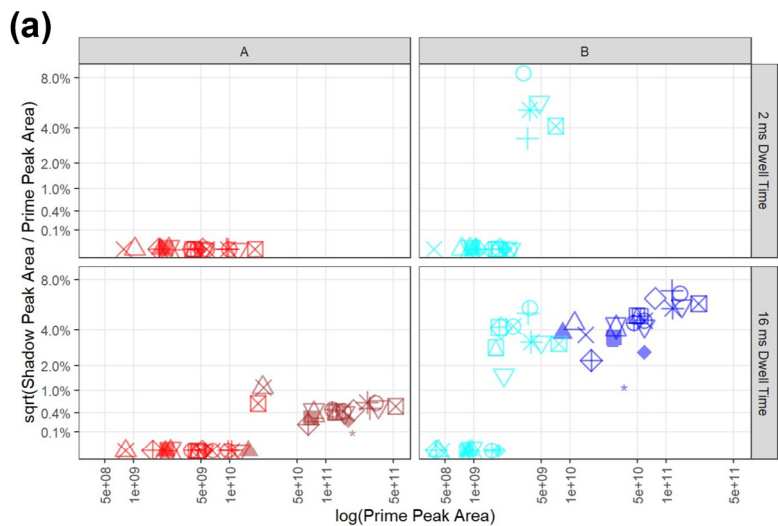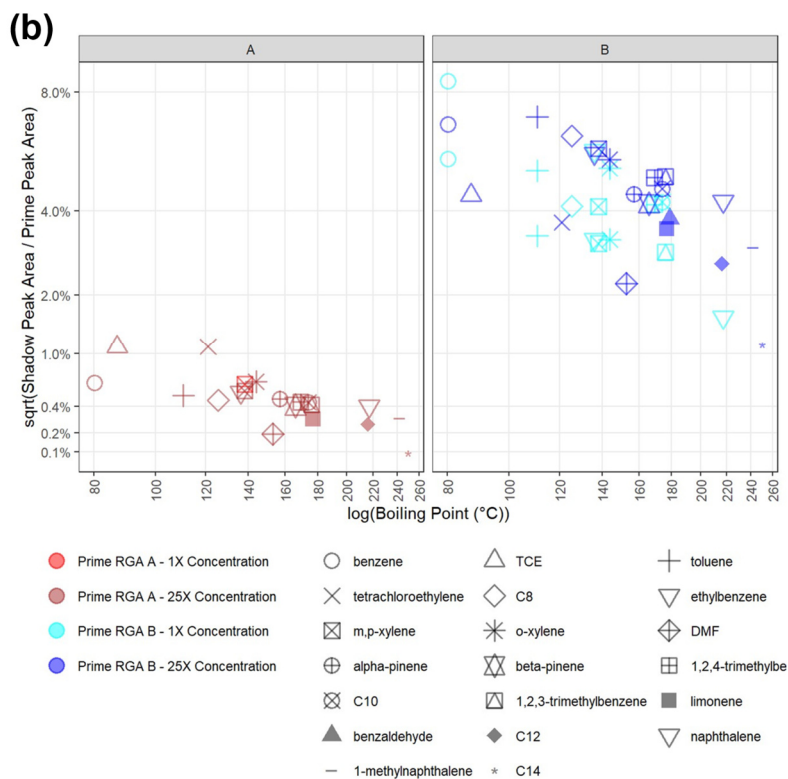

**Figure S3. (a) When the signal of an eluting peak at the prime RGA is sufficiently high, a shadow peak is simultaneously detected at the other RGA. (b) Compounds of higher volatility have higher shadow peak areas as a proportion of the prime peak area.**

### S3 Relative Quadrupole Transmission Efficiency

The ion transmission efficiency of the Pfeiffer PrismaPro's quadrupole mass filter is dependent on mass-to-charge ratio, with lower efficiency at higher mass-to-charge ratios. Ng (2011) characterized this dependence by placing an effusive source of naphthalene within the vacuum chamber of the Aerosol Chemical Speciation Monitor (ACSM), which used an earlier model of the RGA used by MOIRA.(Ng et al., 2011) The mass spectrum of naphthalene measured by the ACSM's RGA was compared with the mass spectrum from the NIST library (as well as with measurements by higher performance instruments) to determine a correction for the relative ion transmission of the quadrupole.

In this study, a similar approach is applied to the measured mass spectra of multiple compounds from chromatograms of calibration standards. Representing different functionalities, the chosen compounds have mass spectra with contributions from a wide range of mass-to-charge values: decane (0.69 ppbv), dodecane (0.57 ppbv), tetradecane (0.49 ppbv), m,p-xylene (3.68 ppbv), naphthalene (0.76 ppbv), 1-methylnaphthalene (0.69 ppbv), alpha-pinene (0.72 ppbv), beta-pinene (0.72 ppbv), limonene (0.72 ppbv), and trichloroethylene (TCE, 0.74 ppb). In these calibration chromatograms, these compounds do not have interference from co-eluting species.

To obtain the mass spectrum of each peak, the average of background scans at the base of each side of the peak is subtracted from the average of the three scans closest to the peak maximum:

$$A_i = \frac{1}{3}(A_i|_{t_r-\Delta t} + A_i|_{t_r} + A_i|_{t_r+\Delta t}) - \frac{1}{2}(A_i|_{t_r-2\sigma} + A_i|_{t_r+2\sigma}) \quad (\text{S3})$$

where  $A_i$  is the abundance of mass-to-charge  $i$  in the mass spectrum,  $t_r$  is the retention time of the scan closest to the fitted peak maximum,  $\Delta t$  is the time resolution of the scan, and  $\sigma$  is the standard deviation of the fitted peak. Both  $t_r$  and  $\sigma$  are determined by fitting each individual peak with the TERN software package (version 2.2.18, Igor Pro 8) (Isaacman-Vanwertz et al., 2017).

The library comparison ratio  $R_i$  for a given ion  $i$  is defined as the ratio of the normalized measured abundance and library abundance:

$$R_i = \frac{\left(\frac{A_i}{A_b \cdot 10^{C_j}}\right)}{A_{i,library}} \quad (\text{S4})$$

where  $A_{i,library}$  is the abundance of mass-to-charge  $i$  in the library mass spectrum (which is itself normalized to the most abundant ion  $b$  in the library mass spectrum),  $A_b$  is the abundance of ion  $b$  in the MOIRA mass spectrum, and  $C_j$  is the compound factor for compound  $j$ . The compound factor  $C_j$  represents a compound-specific adjustment in the normalization of the mass spectrum and results in a vertical offset in the log plot of the library comparison ratio with respect to mass-to-charge ratio (Fig. S4). For example, in the case where  $C_j = 0$ , the measured mass spectrum is normalized to ion  $b$ , which is most abundant in the library spectrum for that compound.

If there is a perfect match between the library and measured mass spectra, then  $\log(R_i) = 0$  for all ions. While other phenomena dependent on mass-to-charge could also contribute to deviations from a perfect match, a single correction is

applied here and named the relative quadrupole transmission efficiency correction. First, a transmission efficiency function  $\log(T(i))$  for each RGA is fitted to the  $\log(R_i)$  values for the calibration data with respect to mass-to-charge  $i$ , iterating to determine  $C_j$  for each compound which minimizes the sum of the residuals for that compound (Fig. S4):

95 
$$\log_{10}(T_i) = m * i + d \quad (S5)$$

where  $m$  is the slope of the regression line, and  $d$  is the intercept. Data points are included in the fit if there is high abundance in both the measured mass spectrum ( $A_i$  exceeding the absolute abundance of a blank signal by approximately 25-fold) and the library mass spectrum ( $A_{i,library} > 0.05$ ). The included mass-to-charge ratios range is 20 to 129, above which there were few abundant ions in the mass spectra of the selected compounds. At mass-to-charge values greater than 129,

100  $T(i)$  is defined as a constant value:

$$T(i) = 10^{m*i+d} \text{ for } 20 \leq i \leq 129 \quad (S6)$$

$$T(i) = 10^{m*129+d} \text{ for } i > 129 \quad (S7)$$

Finally, the mass spectrum can be corrected by dividing by  $T_i$  normalized to the transmission efficiency of the most abundant ion  $b$  ( $T_b$ ), for which  $A_{b,corrected} = A_b$ .

105 
$$A_{i,corrected} = \frac{A_i}{\left(\frac{T(i)}{T(b)}\right)} \quad (S8)$$

The correction was quite stable over a four month period, which included a retuning of both RGAs (Fig. S5). Compared to the correction used for a similar RGA in Ng (2011), there is more correction for smaller  $m/z$  fragments and less correction for higher  $m/z$  fragments.

The correction was evaluated by determining its impact on several metrics (Fig. S6, Fig. S7). The cosine similarity, 110 Pearson correlation coefficient, and Spearman coefficient generally improved or remained constant for the selected compounds, especially those that were poorer before the correction. A smaller impact was observed for the match score used by the NIST library search, which is itself a weighted sum of two factors (Stein, 1994). (Given the thresholds for both library and measured abundance for inclusion in these calculations, the NIST score calculated here is a modified version of the “reverse match score,” which would include only ions in the library mass spectrum.) The first contributing factor is 115 similar to cosine similarity and has similar trends as that metric. The second factor describes the similarity between library and measured ratios of ion pairs which are nearest neighbors in mass-to-charge (among those with  $A_{i,library} > 0.05$  included in this analysis). Since the magnitude of the correction would be similar for ions of similar mass-to-charge value, this second factor (and the overall Reverse Match Score) were less impacted than other metrics. Thus, while this correction improves the similarity of measured and library mass spectrum, the uncorrected mass spectrum would likely yield similar 120 match scores and library compound matches as the corrected mass spectrum.

It is interesting that compounds of the same class have similar trends for the residuals of the relative quadrupole transmission efficiency with respect to mass-to-charge (Fig. S4). For example, ions of lower mass-to-charge are more abundant in MOIRA’s measurements of alkanes and less abundant among the monoterpenes (Fig. S4). Ionization energy also affects the library comparison ratio as well as the magnitude of the ion current. In the indoor measurements in this

125 study, the ionization energy for RGA A was mistakenly set to 80 eV. While library mass spectra are typically acquired at 70 eV, the library comparison ratios are similar from 60 to 80 eV (Fig. S8). Thus, while calibration data used for quantification would need to be acquired at the same ionization energy used for a measurement, the same relative transmission efficiency correction would be appropriate for both 70 and 80 eV.

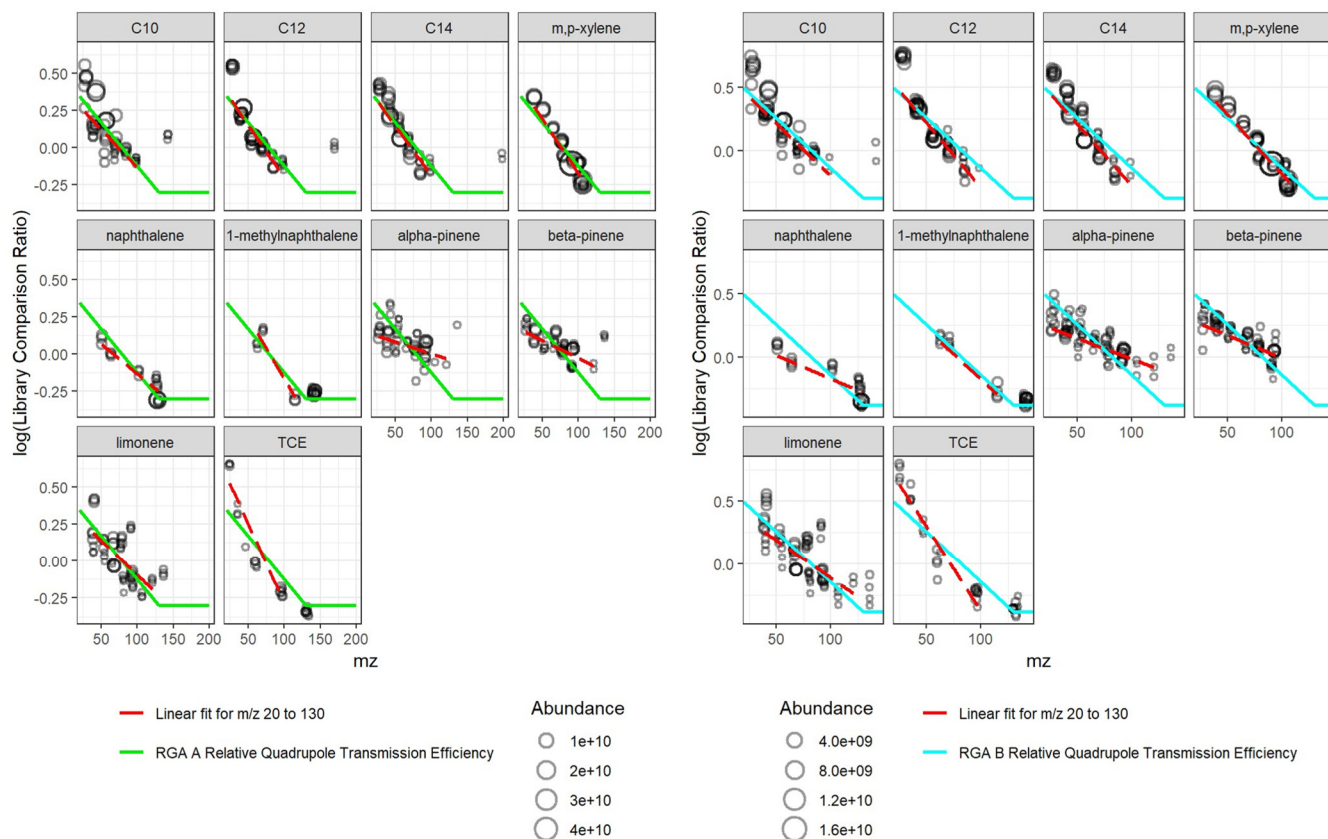

130

**Figure S4.** The relative quadrupole transmission efficiency was fitted separately for each RGA's quadrupole. The compound factor represents a vertical shift for the data for each compound and is iteratively determined to minimize each compound's sum of residuals for the RGA-specific fit (green for RGA A, blue for RGA B).

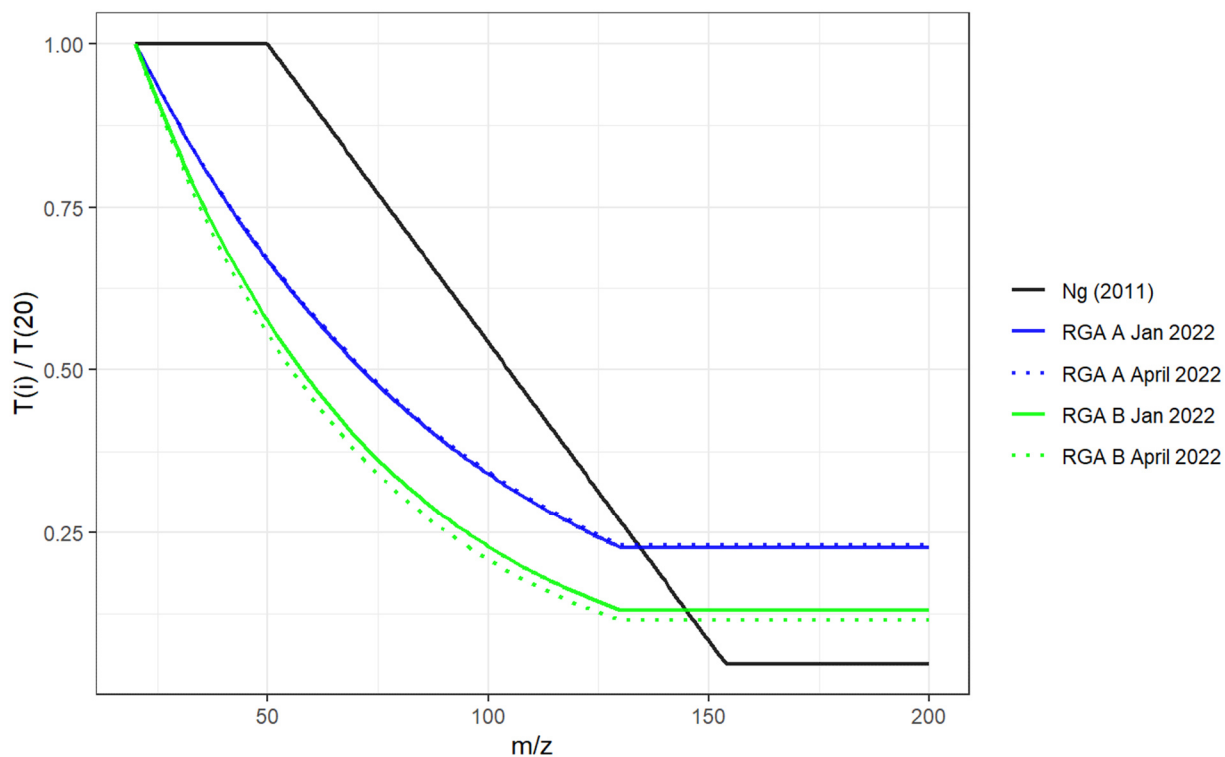

135

Figure S5. Comparison of  $m/z$ -dependent transmission efficiency correction for RGA A and RGA B during January and April 2022 with that for a similar RGA used in Ng (2011).

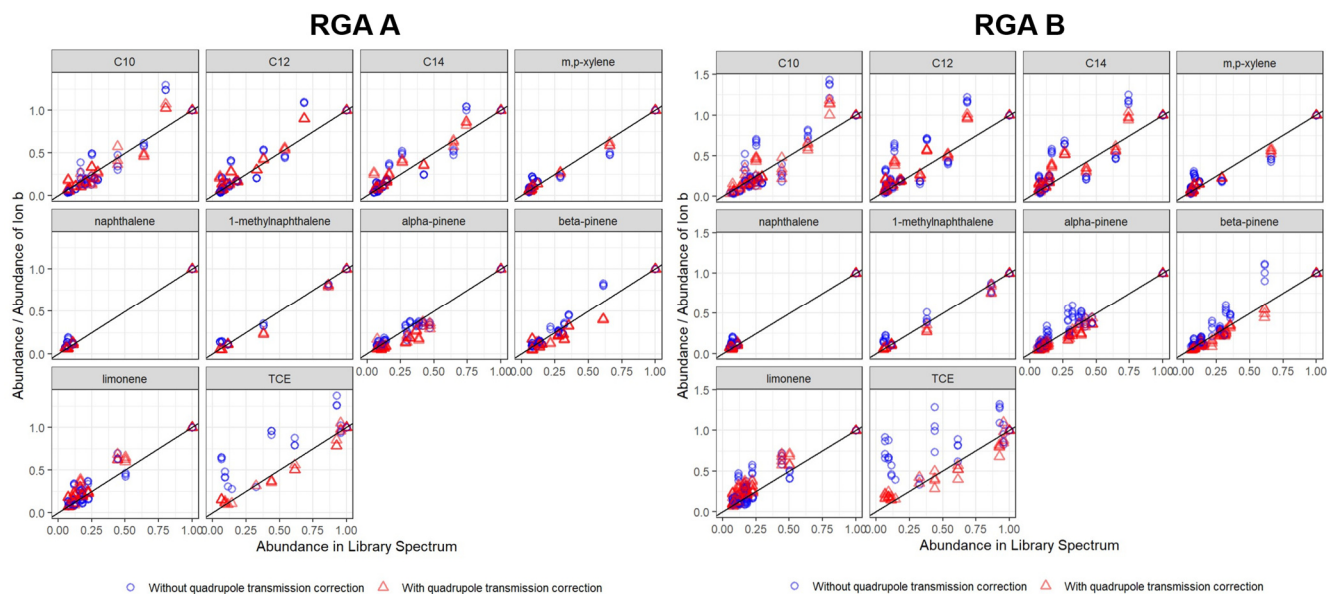

Figure S6. Correcting for quadrupole transmission efficiency increases similarity to the library spectrum.

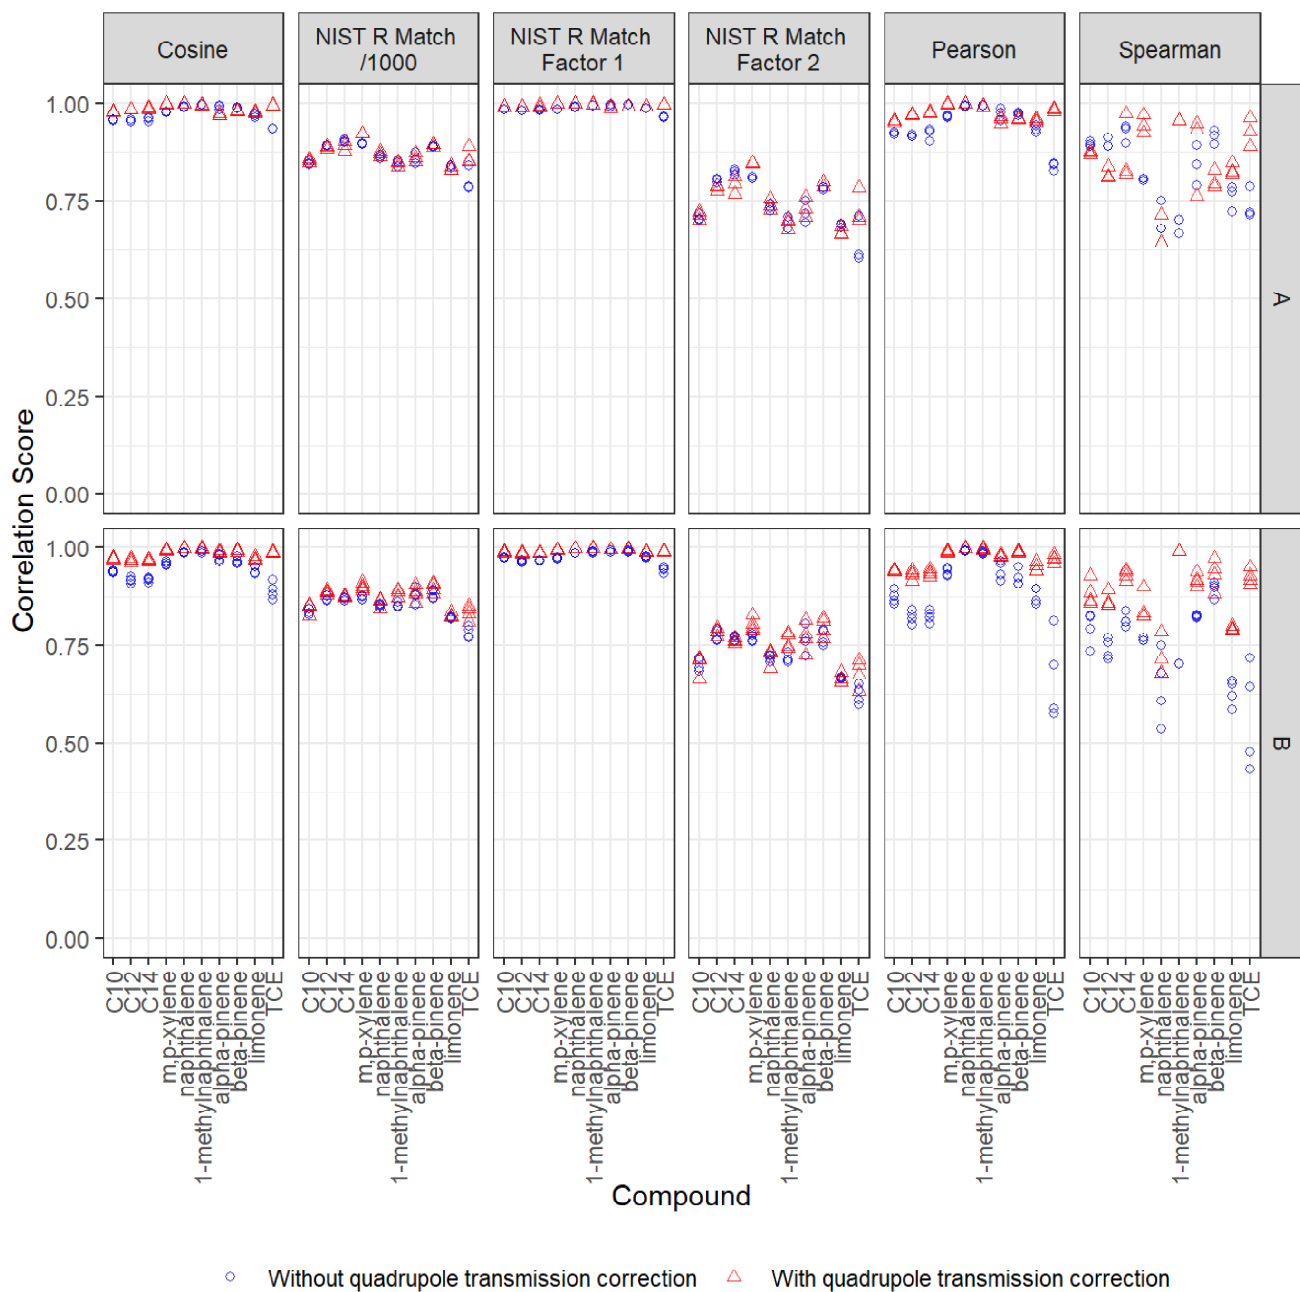

**Figure S7. Correcting for quadrupole transmission efficiency increases similarity to the library spectrum for most compounds and metrics.**

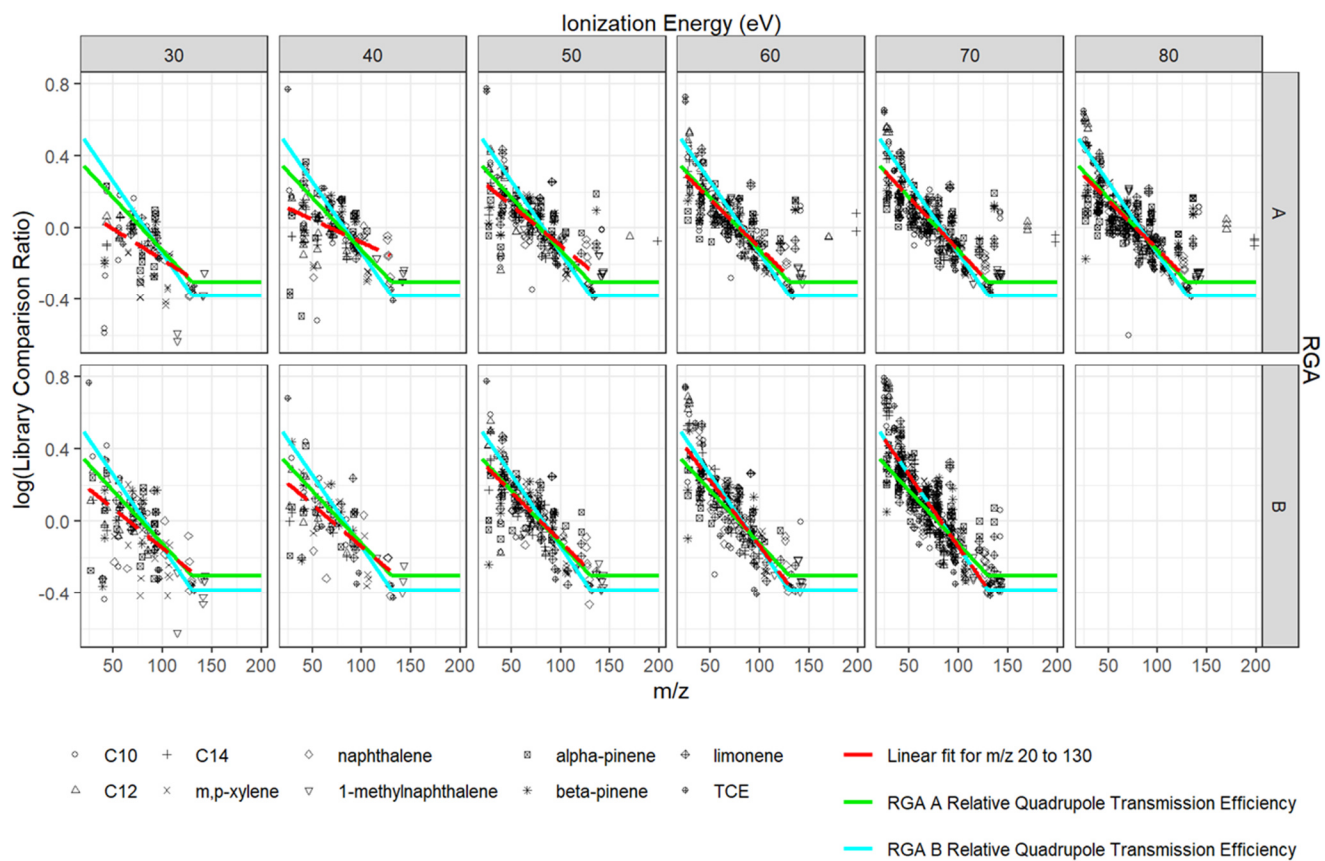

**Figure S8.** In addition to quadrupole transmission efficiency, ionization energy also affects the similarity of the library and measured mass spectrum, though a single correction addresses both.

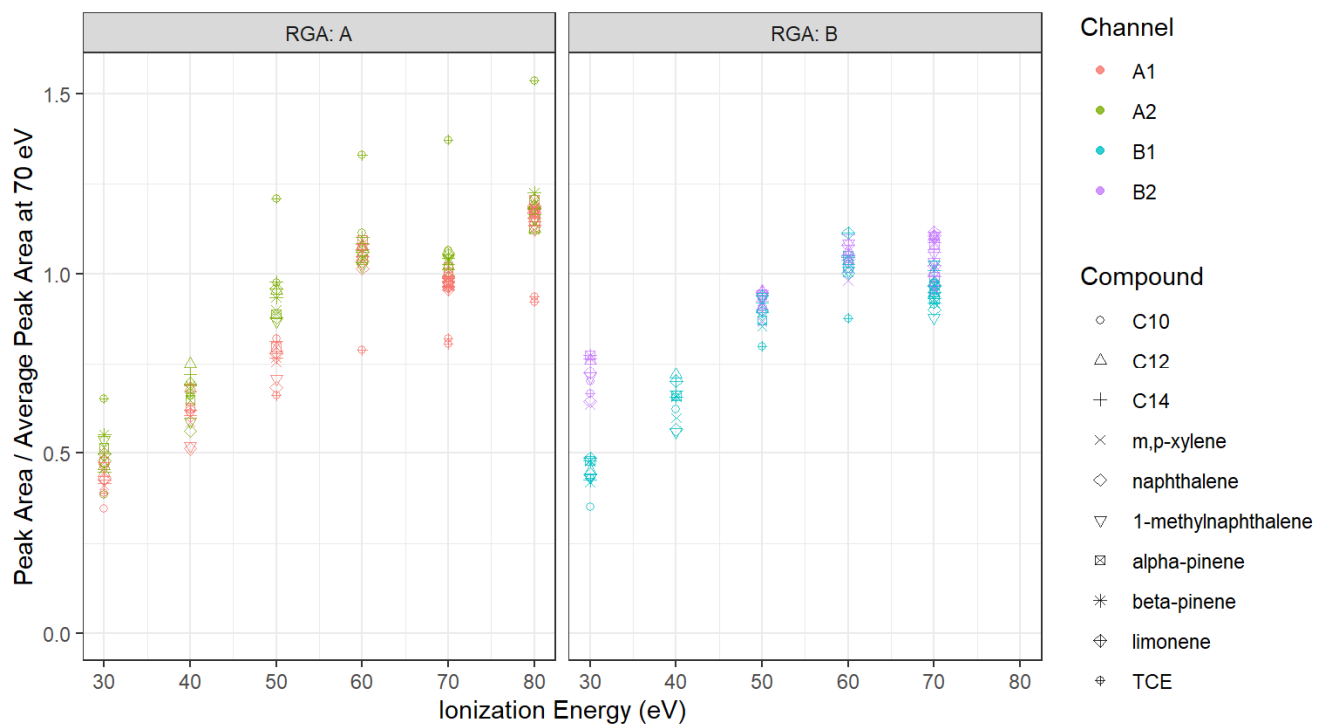

150 Figure S9. Ion current increases with ionization energy.



#### S4 Selective ion monitoring (SIM) methods

Table S1. SIM method used for calibration curve experiment and for mobile measurements by RGA B

| m/z                  | Dwell Time (ms)   |                           |
|----------------------|-------------------|---------------------------|
|                      | Calibration Curve | RGA B Mobile Measurements |
| 27                   | 64                | 16                        |
| 28                   | 2                 | 2                         |
| 31                   | n/a               | 16                        |
| 32                   | 2                 | 2                         |
| 40                   | 2                 | 2                         |
| 41                   | n/a               | 16                        |
| 42                   | n/a               | 16                        |
| 43                   | 16                | 16                        |
| 44                   | 16                | 16                        |
| 45                   | 16                | 16                        |
| 55                   | 16                | 16                        |
| 56                   | n/a               | 16                        |
| 57                   | 16                | 16                        |
| 58                   | 16                | 16                        |
| 68                   | 64                | 64                        |
| 69                   | 16                | 16                        |
| 70                   | 16                | 16                        |
| 78                   | 64                | 64                        |
| 83                   | n/a               | 4                         |
| 91                   | 64                | 64                        |
| 93                   | 16                | 16                        |
| 105                  | 16                | 16                        |
| 128                  | 16                | 16                        |
| 142                  | 16                | 16                        |
| Total Scan Time (ms) | 518               | 552                       |

Table S2. Lifetimes for reaction with ozone

|                        | $\tau_{\text{ozone}}$ (hr) |                      | $\tau_{\text{ozone}}$ (hr) |
|------------------------|----------------------------|----------------------|----------------------------|
| C5                     | $1 \times 10^{+7}$         | styrene              | 7                          |
| C6                     | $1 \times 10^{+7}$         | alpha - pinene       | 1                          |
| C8                     | $1 \times 10^{+7}$         | beta - pinene        | 8                          |
| C10                    | $1 \times 10^{+7}$         | limonene             | 1                          |
| C12                    | $1 \times 10^{+7}$         | butanal              | $1 \times 10^{+4}$         |
| C14                    | $1 \times 10^{+7}$         | pentanal             | $1 \times 10^{+4}$         |
| C15                    | $1 \times 10^{+7}$         | hexanal              | $1 \times 10^{+4}$         |
| benzene                | $1 \times 10^{+4}$         | heptanal             | $1 \times 10^{+4}$         |
| toluene                | $1 \times 10^{+4}$         | octanal              | $1 \times 10^{+4}$         |
| ethylbenzene           | $1 \times 10^{+4}$         | nonanal              | $1 \times 10^{+4}$         |
| m,p-xylene             | $1 \times 10^{+4}$         | decanal              | $1 \times 10^{+4}$         |
| o-xylene               | $1 \times 10^{+4}$         | 2-butenal            | $7 \times 10^{+1}$         |
| 1,2,4-trimethylbenzene | $1 \times 10^{+4}$         | MEK                  | $1 \times 10^{+4}$         |
| 1,2,3-trimethylbenzene | $1 \times 10^{+4}$         | 4-methyl-2-pentanone | $1 \times 10^{+4}$         |
| naphthalene            | $5 \times 10^{+2}$         | 2-hexanone           | $1 \times 10^{+4}$         |
| 1-methylnaphthalene    | $8 \times 10^{+2}$         | cyclohexanone        | $1 \times 10^{+4}$         |
| isoprene               | 9                          | MTBE                 | $1 \times 10^{+4}$         |

160 Table S3. List of detected compounds with molecular weight (MW), retention time (RT), CAS or NIST registry number, boiling point (BP), quantification ion (QI), most abundant ions (AI), identification confidence category (C)<sup>a</sup>, NIST database search scores (match score (M), reverse match score (R), probability score (P), rank score (N)), and datasets (D) in which the compound has been identified<sup>b</sup>

|                         |                                 | MW<br>(g) | RT<br>(s) | CAS or<br>NIST # | BP<br>(°C) | QI | AI             | C <sup>a</sup> | M   | R   | P<br>(%) | N | D <sup>b</sup> |
|-------------------------|---------------------------------|-----------|-----------|------------------|------------|----|----------------|----------------|-----|-----|----------|---|----------------|
| <b>(1) Alkanes</b>      |                                 |           |           |                  |            |    |                |                |     |     |          |   |                |
| 2-methylbutane          | C <sub>5</sub> H <sub>12</sub>  | 72        | 192       | 78-78-4          | 28*        | 43 | 43;42;41;29;57 | B              | 885 | 935 | 71.5     | 1 | I              |
| C5                      | C <sub>5</sub> H <sub>12</sub>  | 72        | 209       | 109-66-0         | 36*        | 43 | 43;42;41;27;39 | A              | 493 | 803 | 16.1     | 1 | C I M          |
| 2-methylpentane         | C <sub>6</sub> H <sub>14</sub>  | 86        | 273       | 107-83-5         | 61*        | 42 | 43;42;41;27;71 | B              | 907 | 933 | 69.4     | 1 | I              |
| 3-methylpentane         | C <sub>6</sub> H <sub>14</sub>  | 86        | 290       | 96-14-0          | 63†        | 57 | 57;56;41;29;27 | C              | 764 | 897 | 39.7     | 1 | I M            |
| C6                      | C <sub>6</sub> H <sub>14</sub>  | 86        | 306       | 110-54-3         | 69*        | 57 | 41;43;57;29;27 | A              | 521 | 887 | 15.6     | 1 | C I M          |
| 2-methylhexane          | C <sub>7</sub> H <sub>16</sub>  | 100       | 405       | 591-76-4         | 90†        | 85 | 43;41;42;57;85 | B              | 828 | 926 | 66.2     | 1 | I              |
| 3-methylhexane          | C <sub>7</sub> H <sub>16</sub>  | 100       | 422       | 589-34-4         | 92‡        | 70 | 43;41;29;71;70 | C              | 784 | 861 | 29.1     | 1 | I              |
| C8 - unknown branched   | C <sub>8</sub> H <sub>18</sub>  | 114       | 446       | 540-84-1         | 99†        | 56 | 57;56;41;43;29 | E              | 864 | 874 | 21       | 1 | I              |
| C7                      | C <sub>7</sub> H <sub>16</sub>  | 100       | 465       | 142-82-5         | 98†        | 71 | 43;29;41;57;71 | C              | 761 | 902 | 60.2     | 1 | I M            |
| 2,3,4-trimethylpentane  | C <sub>8</sub> H <sub>18</sub>  | 114       | 546       | 565-75-3         | 113†       | 70 | 43;71;70;41;27 | C              | 783 | 896 | 22.6     | 1 | I              |
| 2,3,3-trimethylpentane  | C <sub>8</sub> H <sub>18</sub>  | 114       | 556       | 560-21-4         | 115†       | 70 | 43;70;71;41;55 | C              | 733 | 833 | 19.8     | 1 | I              |
| 3-methylheptane         | C <sub>8</sub> H <sub>18</sub>  | 114       | 571       | 589-81-1         | 119†       | 56 | 56;43;57;41;29 | D              | 636 | 833 | 25       | 1 | I              |
| C8                      | C <sub>8</sub> H <sub>18</sub>  | 114       | 598       | 111-65-9         | 126*       | 43 | 43;29;41;57;27 | A              | 605 | 892 | 31.8     | 1 | C I M          |
| C9                      | C <sub>9</sub> H <sub>20</sub>  | 128       | 704       | 111-84-2         | 151†       | 43 | 43;57;29;41;27 | D              | 620 | 822 | 14.5     | 1 | I M            |
| C10                     | C <sub>10</sub> H <sub>22</sub> | 142       | 787       | 124-18-5         | 174*       | 43 | 43;57;41;71;29 | A              | 833 | 902 | 24.5     | 1 | C I M          |
| C11                     | C <sub>11</sub> H <sub>24</sub> | 156       | 865       | 1120-21-4        | 195*       | 43 | 43;57;41;29;71 | D              | 624 | 833 | 17.3     | 1 | I              |
| C12                     | C <sub>12</sub> H <sub>26</sub> | 170       | 939       | 112-40-3         | 216*       | 57 | 57;43;41;71;29 | A              | 851 | 906 | 23.6     | 1 | C I M          |
| unknown branched alkane |                                 |           | 952       |                  |            | 57 | 57;41;43;71;29 | E              |     |     |          |   | I              |
| 6-ethylundecane         | C <sub>13</sub> H <sub>28</sub> | 184       | 996       | 17312-60-6       | 222§       | 57 | 57;43;71;41;56 | C              | 795 | 837 | 11.1     | 2 | I              |
| C13                     | C <sub>13</sub> H <sub>28</sub> | 184       | 1017      | 629-50-5         | 235†       | 57 | 43;57;41;71;29 | B              | 835 | 868 | 6.34     | 1 | I M            |
| unknown branched alkane |                                 |           | 1078      |                  |            | 71 | 57;71;43;41;85 | E              |     |     |          |   | I              |

|                                       |                                 | MW<br>(g) | RT<br>(s) | CAS or<br>NIST #       | BP<br>(°C)   | QI  | AI                    | C <sup>a</sup> | M               | R               | P<br>(%)          | N           | D <sup>b</sup> |
|---------------------------------------|---------------------------------|-----------|-----------|------------------------|--------------|-----|-----------------------|----------------|-----------------|-----------------|-------------------|-------------|----------------|
| C14                                   | C <sub>14</sub> H <sub>30</sub> | 198       | 1093      | 629-59-4               | 250*         | 57  | 43;57;41;71;29        | A              | 851             | 906             | 23.6              | 1           | C I M          |
| C15                                   | C <sub>15</sub> H <sub>32</sub> | 212       | 1178      | 629-62-9               | 267*         | 57  | 43;57;41;71;29        | A              | 888             | 899             | 8.43              | 2           | C I            |
| methylcyclopentane                    | C <sub>6</sub> H <sub>12</sub>  | 84        | 354       | 96-37-7                | 72†          | 56  | 56;41;69;42;39        | B              | 819             | 923             | 44.2              | 1           | I              |
| <b>(2) Aromatics</b>                  |                                 |           |           |                        |              |     |                       |                |                 |                 |                   |             |                |
| 2-methylfuran                         | C <sub>5</sub> H <sub>6</sub> O | 82        | 344       | 534-22-5               | 63‡          | 53  | 53;27;82;39;43        | D              | 541             | 816             | 22.2              | 1           | I              |
| benzene                               | C <sub>6</sub> H <sub>6</sub>   | 78        | 451       | 71-43-2                | 80*          | 78  | 78;52;51;50;<br>77    | A              | 887             | 938             | 67                | 1           | C I M          |
| toluene                               | C <sub>7</sub> H <sub>8</sub>   | 92        | 606       | 108-88-3               | 111*         | 91  | 91;92;39;65;63        | A              | 920             | 922             | 55.6              | 1           | C I M          |
| ethylbenzene                          | C <sub>8</sub> H <sub>10</sub>  | 106       | 699       | 100-41-4               | 136*         | 91  | 91;106;51;39;<br>65   | A              | 946             | 954             | 60                | 1           | C I M          |
| m-xylene and p-xylene<br>(co-eluting) | C <sub>8</sub> H <sub>10</sub>  | 106       | 708       | 108-38-3<br>/ 106-42-3 | 139<br>/ 138 | 91  | 91;106;105;<br>39;51  | A              | 960<br>/<br>921 | 965<br>/<br>925 | 59.1<br>/<br>12.4 | 1<br>/<br>3 | C I M          |
| o-xylene                              | C <sub>8</sub> H <sub>10</sub>  | 106       | 734       | 95-47-6                | 144*         | 91  | 91;106;51;105;<br>39  | A              | 855             | 883             | 19.6              | 2           | C I M          |
| styrene                               | C <sub>8</sub> H <sub>8</sub>   | 104       | 739       | 100-42-5               | 146*         | 104 | 104;51;78;103;<br>77  | A              | 929             | 932             | 59.8              | 1           | C              |
| 1-ethyl-3-methylbenzene               | C <sub>9</sub> H <sub>12</sub>  | 120       | 790       | 620-14-4               | 161‡         | 105 | 105;120;77;39;<br>57  | C              | 805             | 882             | 28.8              | 1           | I M            |
| 1,3,5-trimethylbenzene                | C <sub>9</sub> H <sub>12</sub>  | 120       | 801       | 108-67-8               | 165†         | 105 | 105;120;119;<br>32;77 | D              | 659             | 832             | 37.1              | 1           | M              |
| ethyltoluene                          | C <sub>9</sub> H <sub>12</sub>  | 120       | 815       | 108-67-8               | 165†         | 105 | 105;120;77;<br>91;51  | E              | 598             | 825             | 14.3              | 1           | M              |
| 1,2,4-trimethylbenzene                | C <sub>9</sub> H <sub>12</sub>  | 120       | 818       | 95-63-6                | 169*         | 105 | 105;120;39;<br>77;27  | A              | 871             | 914             | 16.3              | 2           | C I M          |

|                                                           |                                   | MW<br>(g) | RT<br>(s) | CAS or<br>NIST # | BP<br>(°C) | QI  | AI                     | C <sup>a</sup> | M   | R   | P<br>(%) | N | D <sup>b</sup> |
|-----------------------------------------------------------|-----------------------------------|-----------|-----------|------------------|------------|-----|------------------------|----------------|-----|-----|----------|---|----------------|
| 1,2,3-trimethylbenzene                                    | C <sub>9</sub> H <sub>12</sub>    | 120       | 846       | 526-73-8         | 176*       | 105 | 105;120;39;<br>77;27   | A              | 853 | 902 | 13.8     | 2 | C I M          |
| acetophenone                                              | C <sub>8</sub> H <sub>8</sub> O   | 120       | 914       | 98-86-2          | 202†       | 105 | 77;105;51;<br>120;43   | D              | 599 | 829 | 7.51     | 2 |                |
| unknown substituted<br>naphthalene                        | C <sub>12</sub> H <sub>22</sub>   | 166       | 964       | 1008-80-6        | 224‡       | 81  | 41;81;55;95;67         | C              | 757 | 809 | 16.4     | 1 | I              |
| naphthalene                                               | C <sub>10</sub> H <sub>8</sub>    | 128       | 1000      | 91-20-3          | 217*       | 128 | 128;51;64;<br>127;63   | A              | 955 | 957 | 56.3     | 1 | C I M          |
| 1-methylnaphthalene                                       | C <sub>11</sub> H <sub>10</sub>   | 142       | 1107      | 90-12-0          | 242*       | 142 | 142;141;115;<br>71;63  | A              | 935 | 941 | 39.3     | 1 | C I            |
| unknown aromatic                                          | C <sub>12</sub> H <sub>10</sub>   | 154       | 1185      | 92-52-4          | 255‡       | 154 | 154;153;152;<br>76;155 | E              | 638 | 813 | 21.4     | 1 | M              |
| <b>(3) Selected biogenic markers (including terpenes)</b> |                                   |           |           |                  |            |     |                        |                |     |     |          |   |                |
| isoprene                                                  | C <sub>5</sub> H <sub>8</sub>     | 68        | 232       | 78-79-5          | 34*        | 68  | 67;39;53;68;27         | A              | 846 | 920 | 10       | 3 | C I M          |
| alpha-pinene                                              | C <sub>10</sub> H <sub>16</sub>   | 136       | 754       | 80-56-8          | 157*       | 93  | 93;92;41;91;39         | A              | 897 | 909 | 6.39     | 5 | C I            |
| camphene                                                  | C <sub>10</sub> H <sub>16</sub>   | 136       | 772       | 79-92-5          | 160‡       | 93  | 93;121;39;<br>41;79    | C              | 777 | 905 | 10.5     | 1 | I              |
| myrcene                                                   | C <sub>10</sub> H <sub>16</sub>   | 136       | 792       | 123-35-3         | 167‡       | 93  | 41;69;93;39;27         | B              | 886 | 901 | 47.5     | 1 | I              |
| beta-pinene                                               | C <sub>10</sub> H <sub>16</sub>   | 136       | 797       | 127-91-3         | 166        | 93  | 93;41;69;27;28         | A              | 813 | 907 | 27.3     | 1 | C I            |
| limonene                                                  | C <sub>10</sub> H <sub>16</sub>   | 136       | 830       | 138-86-3         | 177*       | 68  | 68;67;93;39;41         | A              | 907 | 916 | 46.2     | 1 | C I            |
| eucalyptol                                                | C <sub>10</sub> H <sub>18</sub> O | 154       | 848       | 470-82-6         | 176‡       | 43  | 43;71;105;81;<br>108   | D              | 539 | 697 | 13.2     | 1 | I              |
| <b>(4) Aldehydes</b>                                      |                                   |           |           |                  |            |     |                        |                |     |     |          |   |                |
| acrolein                                                  | C <sub>3</sub> H <sub>4</sub> O   | 56        | 234       | 107-02-8         | 53‡        | 27  | 27;26;28;56;29         | A              | 720 | 898 | 89.5     | 1 | C I            |
| isobutyraldehyde                                          | C <sub>4</sub> H <sub>8</sub> O   | 72        | 313       | 78-84-2          | 63‡        | 72  | 43;41;27;29;72         | D              | 650 | 810 | 54.1     | 1 | I              |

|                                  |                                              | MW<br>(g) | RT<br>(s) | CAS or<br>NIST # | BP<br>(°C) | QI  | AI                    | C <sup>a</sup> | M   | R   | P<br>(%) | N | D <sup>b</sup> |
|----------------------------------|----------------------------------------------|-----------|-----------|------------------|------------|-----|-----------------------|----------------|-----|-----|----------|---|----------------|
| butanal                          | C <sub>4</sub> H <sub>8</sub> O              | 72        | 361       | 123-72-8         | 75*        | 72  | 27;29;44;43;41        | A              | 858 | 931 | 89.5     | 1 | CI             |
| pentanal                         | C <sub>5</sub> H <sub>10</sub> O             | 86        | 536       | 110-62-3         | 103*       | 44  | 44;29;27;41;58        | A              | 873 | 910 | 83.8     | 1 | CIM            |
| hexanal                          | C <sub>6</sub> H <sub>12</sub> O             | 100       | 657       | 66-25-1          | 129*       | 44  | 44;41;29;56;27        | A              | 914 | 927 | 83.2     | 1 | CIM            |
| furfural                         | C <sub>5</sub> H <sub>4</sub> O <sub>2</sub> | 96        | 718       | 98-01-1          | 162†       | 39  | 39;96;95;29;38        | B              | 943 | 947 | 76.7     | 2 | I              |
| heptanal                         | C <sub>7</sub> H <sub>14</sub> O             | 114       | 752       | 111-71-7         | 154*       | 70  | 44;29;43;41;27        | A              | 906 | 916 | 86       | 1 | CIM            |
| benzaldehyde                     | C <sub>7</sub> H <sub>6</sub> O              | 106       | 828       | 100-52-7         | 179*       | 77  | 77;106;105;51;<br>50  | A              | 892 | 902 | 61.1     | 1 | CIM            |
| octanal                          | C <sub>8</sub> H <sub>16</sub> O             | 128       | 834       | 124-13-0         | 171*       | 110 | 29;43;41;44;27        | A              | 910 | 917 | 79       | 1 | CIM            |
| nonanal                          | C <sub>9</sub> H <sub>18</sub> O             | 142       | 912       | 124-19-6         | 185*       | 57  | 41;29;57;43;44        | A              | 913 | 919 | 77.4     | 1 | CIM            |
| decanal                          | C <sub>10</sub> H <sub>20</sub> O            | 156       | 990       | 112-31-2         | 209*       | 82  | 41;29;43;57;27        | A              | 892 | 896 | 49.1     | 1 | CIM            |
| cinnemaldehyde                   | C <sub>9</sub> H <sub>8</sub> O              | 132       | 1096      | 14371-10-9       | 254‡       | 77  | 131;51;77;132;<br>103 | B              | 857 | 894 | 35       | 1 | I              |
| <b>(5) Unsaturated aldehydes</b> |                                              |           |           |                  |            |     |                       |                |     |     |          |   |                |
| 2-butenal                        | C <sub>4</sub> H <sub>6</sub> O              | 70        | 488       | 4170-30-3        | 102*       | 70  | 41;39;70;29;69        | C              | 773 | 886 | 36.4     | 1 | I              |
| 2-pentenal                       | C <sub>5</sub> H <sub>8</sub> O              | 84        | 624       | 1576-87-0        | 126‡       | 83  | 55;29;27;39;41        | C              | 717 | 847 | 10.8     | 1 | I              |
| 2-hexenal                        | C <sub>6</sub> H <sub>10</sub> O             | 98        | 723       | 6728-26-3        | 145‡       | 83  | 41;39;27;55;29        | C              | 782 | 845 | 29.9     | 1 | I              |
| 2-heptenal                       | C <sub>7</sub> H <sub>12</sub> O             | 112       | 812       | 57266-86-1       | 166§       | 41  | 41;27;55;29;39        | B              | 880 | 942 | 68.3     | 1 | I              |
| 2-octenal                        | C <sub>8</sub> H <sub>14</sub> O             | 126       | 894       | 2548-87-0        | 190§       | 70  | 29;41;55;70;27        | C              | 804 | 849 | 19.5     | 1 | I              |
| <b>(6) Alcohols</b>              |                                              |           |           |                  |            |     |                       |                |     |     |          |   |                |
| methanol                         | CH <sub>4</sub> O                            | 32        | 165       | 67-56-1          | 65†        | 29  | 31;32;29;30;28        | A              | 927 | 964 | 92.2     | 1 | C              |
| ethanol                          | C <sub>2</sub> H <sub>6</sub> O              | 46        | 220       | 64-17-5          | 78†        | 31  | 31;45;29;46;27        | D              | 601 | 864 | 83.5     | 1 | I              |
| isopropyl alcohol                | C <sub>3</sub> H <sub>8</sub> O              | 60        | 265       | 67-63-0          | 82†        | 45  | 45;28;29;43;27        | D              | 492 | 848 | 30       | 1 | IM             |
| tert-butyl alcohol               | C <sub>4</sub> H <sub>10</sub> O             | 74        | 292       | 75-65-0          | 82†        | 59  | 59;31;41;43;29        | C              | 752 | 876 | 30.3     | 1 | I              |
| 1-propanol                       | C <sub>3</sub> H <sub>8</sub> O              | 60        | 337       | 71-23-8          | 97†        | 31  | 31;27;59;29;41        | D              | 458 | 800 | 23.8     | 1 | I              |
| 1-butanol                        | C <sub>4</sub> H <sub>10</sub> O             | 74        | 502       | 71-36-3          | 117*       | 31  | 31;56;41;27;43        | B              | 898 | 905 | 71.8     | 1 | I              |

|                             |                                               | MW<br>(g) | RT<br>(s) | CAS or<br>NIST # | BP<br>(°C) | QI  | AI                   | C <sup>a</sup> | M   | R   | P<br>(%) | N | D <sup>b</sup> |
|-----------------------------|-----------------------------------------------|-----------|-----------|------------------|------------|-----|----------------------|----------------|-----|-----|----------|---|----------------|
| 1-pentanol                  | C <sub>5</sub> H <sub>12</sub> O              | 88        | 630       | 71-41-0          | 138†       | 42  | 42;31;29;41;55       | B              | 875 | 897 | 63.7     | 1 | I              |
| 1-hexanol                   | C <sub>6</sub> H <sub>14</sub> O              | 102       | 726       | 111-27-3         | 157†       | 56  | 56;43;29;41;31       | D              | 488 | 796 | 4.64     | 2 | I              |
| furfuryl alcohol            | C <sub>5</sub> H <sub>6</sub> O <sub>2</sub>  | 98        | 739       | 98-00-0          | 168†       | 98  | 41;39;98;42;29       | B              | 914 | 927 | 75.6     | 1 | I              |
| unknown C8 alcohol          | C <sub>8</sub> H <sub>18</sub> O              | 130       | 855       | 104-76-7         | 186†       | 57  | 57;41;43;29;56       | C              | 695 | 859 | 17.8     | 1 | I              |
| 2,6-dimethyloct-7-en-2-ol   | C <sub>10</sub> H <sub>20</sub> O             | 156       | 884       | 18479-58-8       | 188‡       | 59  | 59;43;41;55;29       | B              | 847 | 909 | 57.3     | 1 | I              |
| benzyl alcohol              | C <sub>7</sub> H <sub>8</sub> O               | 108       | 896       | 100-51-6         | 205†       | 79  | 79;77;108;51;<br>107 | D              | 539 | 844 | 7.72     | 1 | I              |
| unknown alcohol             |                                               |           | 899       |                  |            | 59  | 59;43;41;69;29       | E              |     |     |          |   | I              |
| unknown alcohol             | C <sub>10</sub> H <sub>18</sub> O             | 154       | 981       | 464-45-9         | 210‡       | 95  | 95;41;43;27;55       | C              | 699 | 826 | 11.9     | 1 | I              |
| <b>(7) Carboxylic acids</b> |                                               |           |           |                  |            |     |                      |                |     |     |          |   |                |
| formic acid                 | CH <sub>2</sub> O <sub>2</sub>                | 46        | 396       | 64-18-6          | 101†       | 45  | 29;46;45;44;28       | C              | 702 | 899 | 83.3     | 1 | M              |
| acetic acid                 | C <sub>2</sub> H <sub>4</sub> O <sub>2</sub>  | 60        | 462       | 64-19-7          | 118†       | 45  | 45;43;60;42;29       | C              | 729 | 881 | 52.9     | 1 | I M            |
| Propanoic acid              | C <sub>3</sub> H <sub>6</sub> O <sub>2</sub>  | 74        | 586       | 79-09-4          | 142†       | 74  | 28;29;27;45;74       | D              | 518 | 831 | 28.1     | 1 | I M            |
| butanoic acid               | C <sub>4</sub> H <sub>8</sub> O <sub>2</sub>  | 88        | 675       | 107-92-6         | 164†       | 60  | 44;60;73;27;42       | D              | 534 | 661 | 2.06     | 4 | M              |
| pentanoic acid              | C <sub>5</sub> H <sub>10</sub> O <sub>2</sub> | 102       | 760       | 109-52-4         | 186†       | 60  | 60;73;45;41;32       | D              | 588 | 804 | 49.9     | 1 | M              |
| hexanoic acid               | C <sub>6</sub> H <sub>12</sub> O <sub>2</sub> | 116       | 837       | 142-62-1         | 202‡       | 60  | 60;73;41;29;43       | D              | 667 | 772 | 9.33     | 1 | M              |
| benzoic acid                | C <sub>7</sub> H <sub>6</sub> O <sub>2</sub>  | 122       | 1027      | 65-85-0          | 249‡       | 105 | 105;122;77;51;<br>28 | C              | 781 | 879 | 20.3     | 1 | M              |
| <b>(8) Esters</b>           |                                               |           |           |                  |            |     |                      |                |     |     |          |   |                |
| methyl methacrylate         | C <sub>5</sub> H <sub>8</sub> O <sub>2</sub>  | 100       | 528       | 80-62-6          | 101†       | 69  | 41;69;39;100;40      | B              | 899 | 920 | 88.8     | 1 | I              |
| ethyl-2-methylbutanoate     | C <sub>7</sub> H <sub>14</sub> O <sub>2</sub> | 130       | 684       | 7452-79-1        | 123*       | 41  | 29;57;41;102;27      | B              | 832 | 921 | 91.2     | 1 | I              |
| ethyl-2-methylpentanoate    | C <sub>8</sub> H <sub>16</sub> O <sub>2</sub> | 144       | 761       | 39255-32-8       | 153‡       | 102 | 43;102;29;74;71      | B              | 841 | 873 | 77.6     | 1 | I              |
| hexyl acetate               | C <sub>8</sub> H <sub>16</sub> O <sub>2</sub> | 144       | 823       | 142-92-7         | 170*       | 43  | 43;56;41;61;55       | C              | 794 | 869 | 71.9     | 1 | I              |
| heptanoic acid ethyl ester  | C <sub>9</sub> H <sub>18</sub> O <sub>2</sub> | 158       | 885       | 106-30-9         | 188‡       | 88  | 88;29;43;73;60       | C              | 706 | 801 | 74.6     | 1 | I              |

|                                                        |                                                | MW<br>(g) | RT<br>(s) | CAS or<br>NIST # | BP<br>(°C) | QI  | AI              | C <sup>a</sup> | M   | R   | P<br>(%) | N | D <sup>b</sup> |
|--------------------------------------------------------|------------------------------------------------|-----------|-----------|------------------|------------|-----|-----------------|----------------|-----|-----|----------|---|----------------|
| unknown acetate                                        | C <sub>10</sub> H <sub>20</sub> O <sub>2</sub> | 172       | 931       | 72218-58-7       | 196§       | 43  | 43;70;41;55;69  | D              | 607 | 878 | 3.85     | 1 | I              |
| 1-(1-methoxypropan-2-<br>yloxy) propan-2-yl<br>acetate | C <sub>9</sub> H <sub>18</sub> O <sub>4</sub>  | 190       | 961       | NIST<br>367086   |            | 59  | 59;43;28;29;73  | C              | 782 | 862 | 81       | 1 | I              |
| benzyl acetate                                         | C <sub>9</sub> H <sub>10</sub> O <sub>2</sub>  | 150       | 969       | 140-11-4         | 215†       | 91  | 108;43;91;90;79 | B              | 910 | 933 | 89.1     | 1 | I              |
| unknown acetate                                        | C <sub>12</sub> H <sub>22</sub> O <sub>2</sub> | 198       | 1068      | 32210-23-4       | 222‡       | 57  | 57;43;82;67;41  | E              | 825 | 840 | 45.9     | 1 | I              |
| unknown acetate                                        | C <sub>12</sub> H <sub>22</sub> O <sub>2</sub> | 198       | 1084      | 32210-23-4       | 222‡       | 57  | 57;43;82;67;41  | C              | 799 | 849 | 44.1     | 1 | I              |
| dibutyl ethanedioate                                   | C <sub>10</sub> H <sub>18</sub> O <sub>4</sub> | 202       | 1115      | 2050-60-4        | 246‡       | 57  | 57;29;41;56;27  | A              | 691 | 849 | 17.3     | 1 | C              |
| unknown acetate                                        | C <sub>12</sub> H <sub>22</sub> O <sub>2</sub> | 198       | 1129      | 32210-23-4       | 222‡       | 57  | 57;43;41;67;82  | E              | 771 | 868 | 57.9     | 1 | I              |
| <b>(9) Ketones</b>                                     |                                                |           |           |                  |            |     |                 |                |     |     |          |   |                |
| acetone                                                | C <sub>3</sub> H <sub>6</sub> O                | 58        | 248       | 67-64-1          | 56†        | 58  | 43;58;27;42;28  | A              | 627 | 934 | 69.1     | 1 | C I M          |
| methacrolein                                           | C <sub>4</sub> H <sub>6</sub> O                | 70        | 328       | 78-85-3          | 69‡        | 70  | 41;39;70;30;29  | D              | 512 | 799 | 17.4     | 1 | M              |
| methyl vinyl ketone                                    | C <sub>4</sub> H <sub>6</sub> O                | 70        | 358       | 78-94-4          | 80‡        | 70  | 55;43;27;70;28  | C              | 681 | 836 | 53.3     | 1 | M              |
| methyl ethyl ketone                                    | C <sub>4</sub> H <sub>8</sub> O                | 72        | 379       | 78-93-3          | 70*        | 43  | 43;29;27;72;57  | A              | 855 | 941 | 83.5     | 1 | C I M          |
| 4-methyl-2-pentanone                                   | C <sub>6</sub> H <sub>12</sub> O               | 100       | 594       | 108-10-1         | 116*       | 43  | 43;58;41;29;57  | A              | 867 | 886 | 55.6     | 1 | C I            |
| 2-hexanone                                             | C <sub>6</sub> H <sub>12</sub> O               | 100       | 650       | 591-78-6         | 127*       | 43  | 43;58;29;41;27  | A              | 910 | 928 | 72.5     | 1 | C              |
| cyclohexanone                                          | C <sub>6</sub> H <sub>10</sub> O               | 98        | 772       | 108-94-1         | 155*       | 55  | 55;42;41;27;39  | A              | 890 | 903 | 29.9     | 2 | C              |
| 4-cyclopentene-1,3-<br>dione                           | C <sub>5</sub> H <sub>4</sub> O <sub>2</sub>   | 96        | 785       | 930-60-9         | 226§       | 96  | 42;96;26;68;40  | B              | 814 | 906 | 92.7     | 1 | I              |
| <b>(10) Ether</b>                                      |                                                |           |           |                  |            |     |                 |                |     |     |          |   |                |
| methyl tert-butyl ether                                | C <sub>5</sub> H <sub>12</sub> O               | 88        | 291       | 1634-04-4        | 55*        | 73  | 73;41;29;43;57  | C              | 763 | 906 | 68.1     | 1 |                |
| <b>(11) Sulfur-containing</b>                          |                                                |           |           |                  |            |     |                 |                |     |     |          |   |                |
| diallyl disulfide                                      | C <sub>6</sub> H <sub>10</sub> S <sub>2</sub>  | 146       | 901       | 2179-57-9        | 173‡       | 41  | 41;39;45;28;81  | C              | 765 | 831 | 91.1     | 1 | I              |
| unknown sulfur-<br>containing                          | C <sub>6</sub> H <sub>14</sub> S <sub>2</sub>  | 150       | 915       | 629-19-6         | 193‡       | 108 | 43;41;108;27;39 | C              | 737 | 829 | 68       | 1 | I              |



|                                 |                                                | MW<br>(g) | RT<br>(s) | CAS or<br>NIST # | BP<br>(°C) | QI  | AI                   | C <sup>a</sup> | M   | R   | P<br>(%) | N | D <sup>b</sup> |
|---------------------------------|------------------------------------------------|-----------|-----------|------------------|------------|-----|----------------------|----------------|-----|-----|----------|---|----------------|
| <b>(12) Nitrogen-containing</b> |                                                |           |           |                  |            |     |                      |                |     |     |          |   |                |
| acetonitrile                    | C <sub>2</sub> H <sub>3</sub> N                | 41        | 273       | 75-05-8          | 82†        | 41  | 41;40;39;38;28       | A              | 850 | 979 | 80.7     | 1 | C              |
| n,n-dimethylformamide           | C <sub>3</sub> H <sub>7</sub> NO               | 73        | 686       | 68-12-2          | 153*       | 73  | 44;73;42;28;30       | A              | 940 | 959 | 97.8     | 1 | C              |
| <b>(13) Chlorine-containing</b> |                                                |           |           |                  |            |     |                      |                |     |     |          |   |                |
| 1,1-dichloroethane              | C <sub>2</sub> H <sub>4</sub> Cl <sub>2</sub>  | 99        | 329       | 75-34-3          | 57*        | 27  | 27;63;65;28;26       | A              | 604 | 814 | 84.9     | 1 | C              |
| 1,1,1-trichloroethane           | C <sub>2</sub> H <sub>3</sub> Cl <sub>3</sub>  | 133       | 414       | 71-55-6          | 74*        | 97  | 97;61;99;28;26       | A              | 686 | 847 | 85.5     | 1 | C              |
| 1,2-dichloroethane              | C <sub>2</sub> H <sub>4</sub> Cl <sub>2</sub>  | 99        | 460       | 107-06-2         | 84*        | 62  | 27;62;49;64;26       | A              | 647 | 844 | 87.6     | 1 | C              |
| trichloroethylene               | C <sub>2</sub> HCl <sub>3</sub>                | 131       | 506       | 79-01-6          | 87*        | 130 | 95;60;130;97;<br>132 | A              | 708 | 852 | 95.4     | 1 | C              |
| 1,2-dichloropropane             | C <sub>3</sub> H <sub>6</sub> Cl <sub>2</sub>  | 113       | 529       | 78-87-5          | 97*        | 27  | 27;63;62;41;39       | A              | 716 | 857 | 94.1     | 1 | C              |
| tetrachloroethylene             | C <sub>2</sub> Cl <sub>4</sub>                 | 166       | 637       | 127-18-4         | 121*       | 47  | 47;35;28;129;94      | A              | 695 | 765 | 87.6     | 1 | C              |
| <b>(14) Unknown category</b>    |                                                |           |           |                  |            |     |                      |                |     |     |          |   |                |
| unknown                         |                                                |           | 260       |                  |            | 29  | 43;29;42;72;28       | E              |     |     |          |   | I              |
| unknown                         |                                                |           | 482       |                  |            | 81  | 81;41;55;27;39       | E              |     |     |          |   | I              |
| unknown                         |                                                |           | 517       |                  |            | 83  | 41;43;55;83;42       | E              |     |     |          |   | I              |
| unknown                         |                                                |           | 646       |                  |            | 41  | 41;39;43;45;27       | E              |     |     |          |   | I              |
| unknown                         |                                                |           | 721       |                  |            | 82  | 39;82;27;54;53       | E              |     |     |          |   | I              |
| unknown                         |                                                |           | 790       |                  |            | 91  | 91;120;92;65;51      | E              |     |     |          |   | M              |
| unknown                         |                                                |           | 856       |                  |            | 70  | 43;70;71;57;28       | E              |     |     |          |   | I              |
| unknown                         | C <sub>7</sub> H <sub>10</sub> O               | 110       | 865       | 4313-03-5        | 177§       | 81  | 81;39;41;27;53       | E              | 861 | 914 | 57.9     | 1 | I              |
| unknown                         | C <sub>6</sub> H <sub>6</sub> O                | 94        | 881       | 108-95-2         | 182†       | 94  | 94;39;66;65;40       | E              | 636 | 824 | 13.9     | 1 | IM             |
| unknown                         |                                                |           | 922       |                  |            | 148 | 41;45;43;106;39      | E              |     |     |          |   | I              |
| unknown                         |                                                |           | 943       |                  |            | 81  | 81;43;41;57;80       | E              |     |     |          |   | I              |
| unknown                         | C <sub>11</sub> H <sub>22</sub> O <sub>4</sub> | 218       | 948       | NIST<br>378331   |            | 101 | 43;101;73;45;41      | E              | 715 | 784 | 55.3     | 1 | I              |

|         |                                                | MW<br>(g) | RT<br>(s) | CAS or<br>NIST # | BP<br>(°C)       | QI | AI             | C <sup>a</sup> | M   | R   | P<br>(%) | N | D <sup>b</sup> |
|---------|------------------------------------------------|-----------|-----------|------------------|------------------|----|----------------|----------------|-----|-----|----------|---|----------------|
| unknown |                                                |           | 976       |                  |                  | 45 | 45;73;39;88;47 | E              |     |     |          |   | I              |
| unknown |                                                |           | 1033      |                  |                  | 69 | 41;69;39;55;94 | E              |     |     |          |   | I              |
| unknown |                                                |           | 1104      |                  |                  | 81 | 81;41;29;39;27 | E              |     |     |          |   | I              |
| unknown | C <sub>15</sub> H <sub>24</sub>                | 204       | 1178      | 87-44-5          | 253 <sup>‡</sup> | 41 | 41;69;93;79;39 | E              | 908 | 912 | 17.4     | 1 | I              |
| unknown | C <sub>11</sub> H <sub>12</sub> O <sub>3</sub> | 192       | 1193      | NIST<br>132074   |                  | 66 | 43;66;67;39;83 | E              | 790 | 835 | 61.4     | 1 | I              |

<sup>a</sup> Identification confidence category: Each compound identification is categorized as follows: A = positive identification in calibration standard, B = average of match and reverse match scores in NIST database search is greater than 850, C = average of match and reverse match scores in NIST database search is between 750 and 850, D = average of match and reverse match scores is less than 750, E = User determines that none of the proposed matches from the database search is superior to others (ex. stereoisomers with very similar MS spectra, matches with unsuitable retention index). In some cases, a CAS or NIST number (and compound properties) of the top match are still provided for unidentified compounds in the E category.

<sup>b</sup> Datasets: The letters indicate the datasets (C = calibration standards, I = indoor measurements, M = mobile measurements) in which the compound has been quantified. The absence of quantification does not necessarily indicate that the compound was absent in that dataset.

\* Experimental boiling point (NIST Chemistry Webbook, 2023)

† Experimental boiling point (CRC Handbook of Chemistry and Physics Online)

‡ Experimental boiling point (Reaxys, 2023)

§ Modeled boiling point (ChemSpider, 2023)

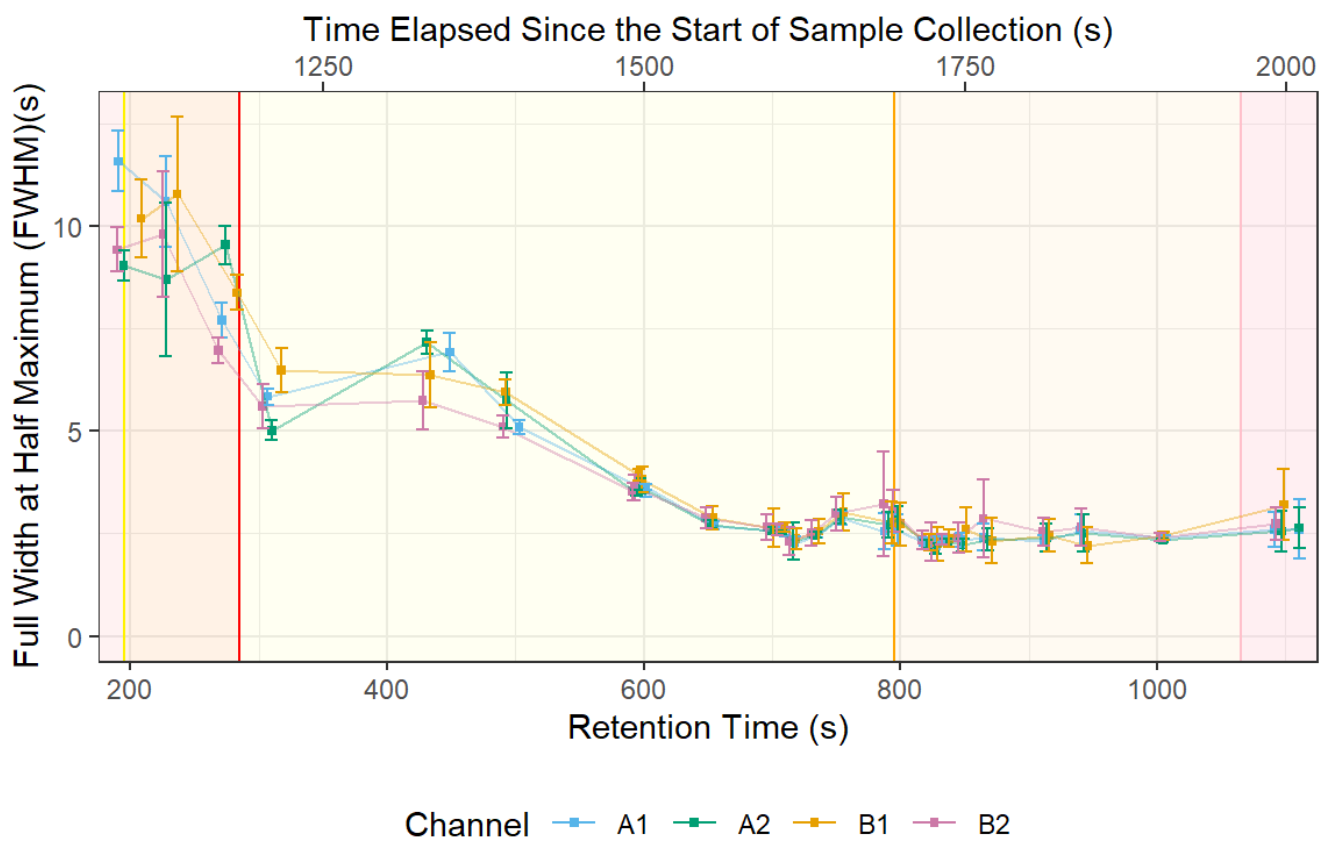

180 Figure S10. Full width at half maximum (FWHM) of chromatography peaks from the indoor measurements as a function of retention time (error bar is  $\pm 1$  standard deviation). The shaded regions indicate thermal desorption (red), the first GC temperature ramp (yellow, overlaps with thermal desorption), the second GC temperature ramp (orange), and the GC hold (pink). Error bars indicate one standard deviation.

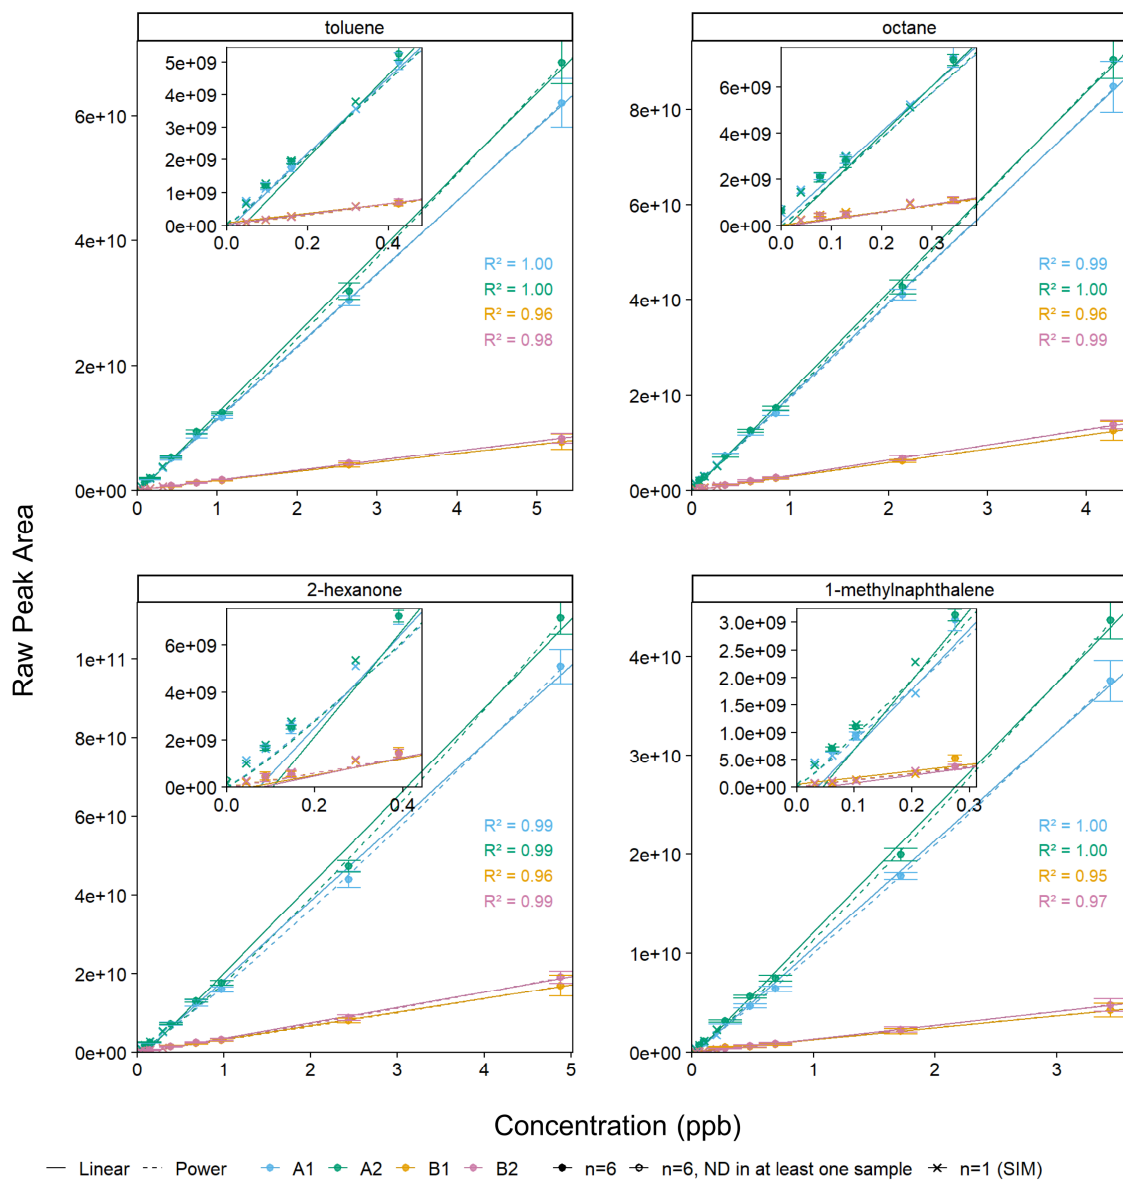

Figure S11. Linear and power calibration curves (error bars  $\pm 1$  SD) for raw peak areas of four compounds. The inset plot shows the lower range of data. Open circles indicate concentration levels for which no peak was detected on among at least one of the 2 ms scan replicates ( $n=6$ ). Pearson  $R^2$  values are for the replicates for which  $n=6$  (filled circles).

185

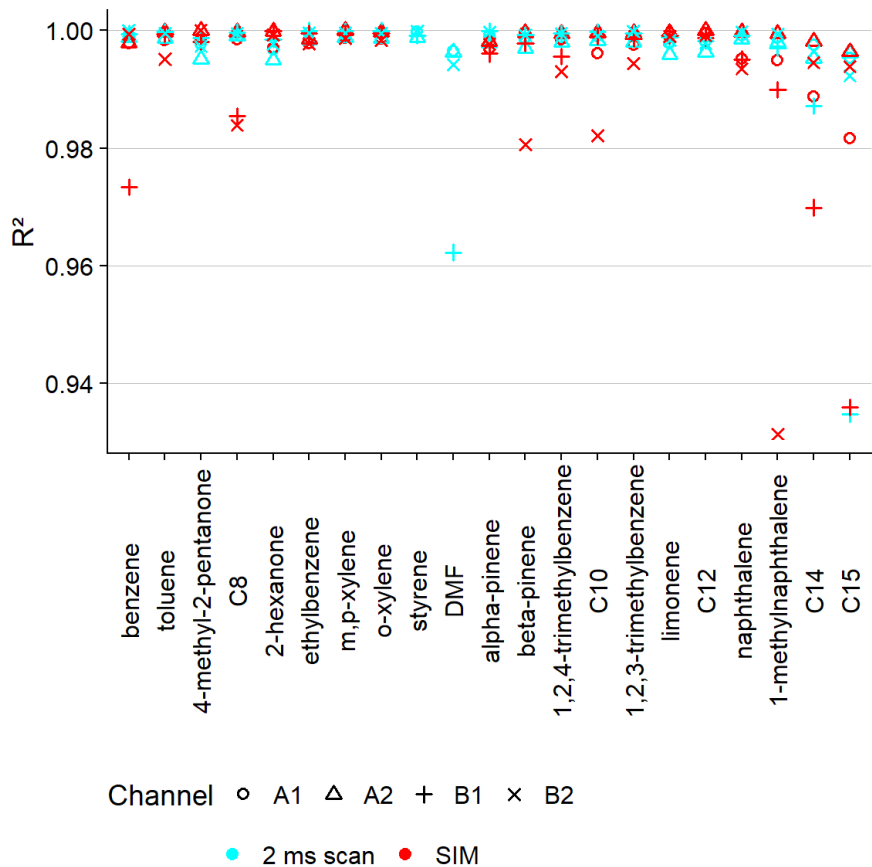

Figure S12. Pearson R<sup>2</sup> values for linear calibration curves. For the seven concentration levels tested with the 2 ms scan method, only levels with six detectable replicates are included. The SIM method data includes one replicate of four concentration levels. Alkanes are indicated with their carbon number.

190

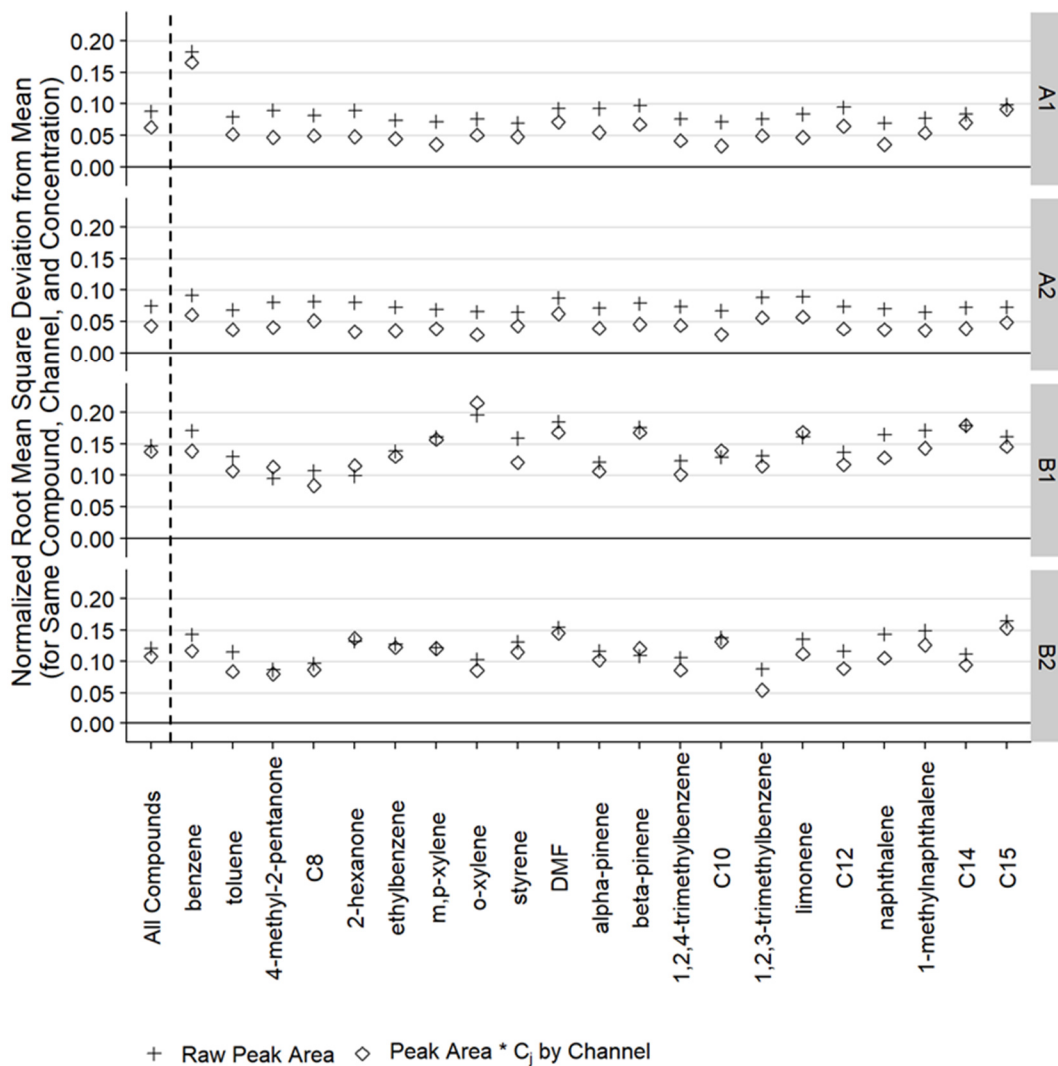

Figure S13. The precision within a single channel is described by the normalized root mean square deviation (NRMSD) from the mean response for the same compound, channel, and concentration as calculated with raw peak area and with the daily correction factor  $C_j$  which accounts for MS drift (2 ms scan method, including concentration, compound, and channel sets with six replicates, excluding most volatile compounds which evaporated from liquid calibration standard). Single channel precision is in general better for the more sensitive RGA A and with the daily drift correction. Alkanes are indicated by their carbon number.

195

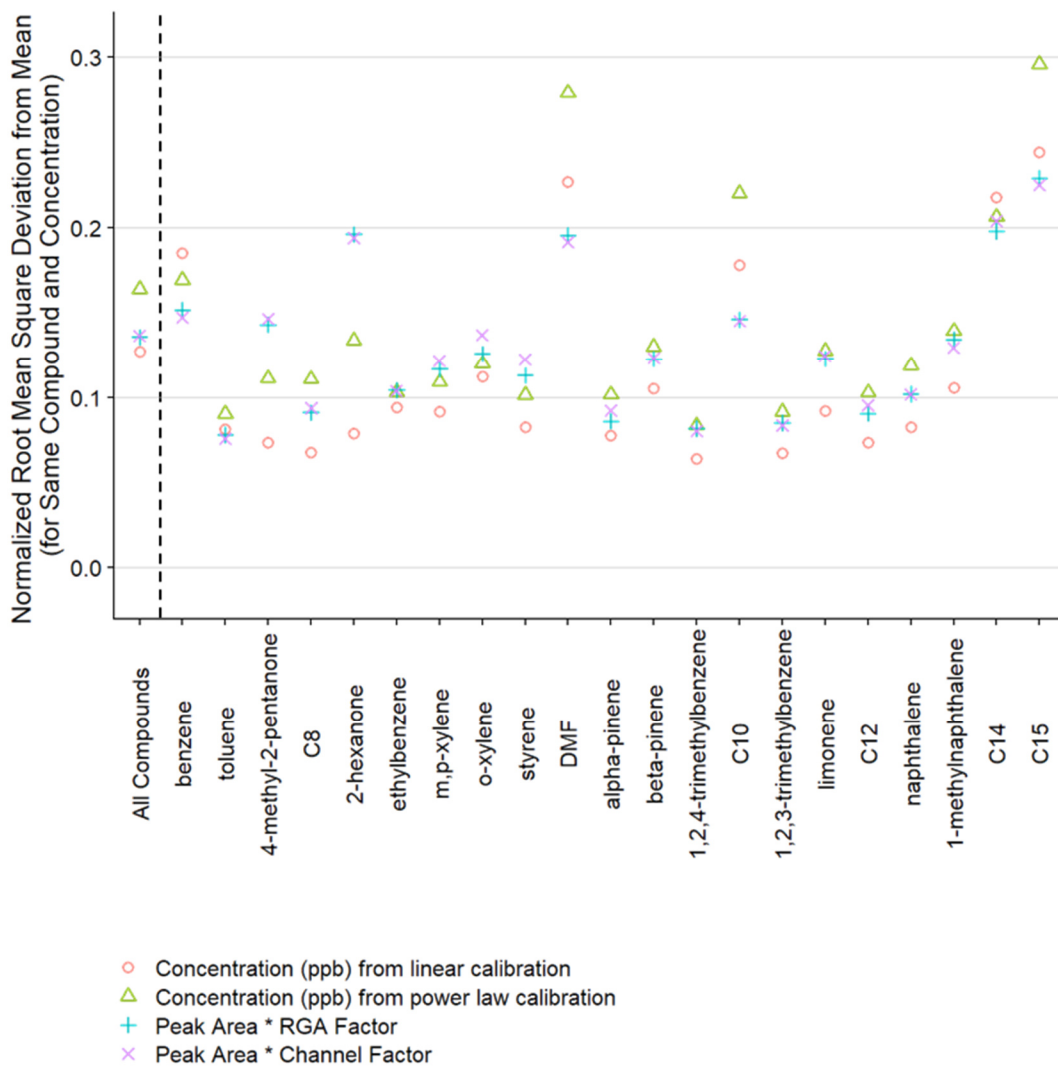

Figure S14. The 4-channel measurement precision is calculated by the normalized root mean square deviation (NRMSD) from the mean response across all channels for the same compound and concentration (2 ms scan method, including concentration, compound, and channel sets with six replicates, excluding most volatile compounds which evaporated from liquid calibration standard, accounting for the daily MS drift correction factor  $C_j$ ). Alkanes are indicated by their carbon number.

200

## S6 Indoor measurements

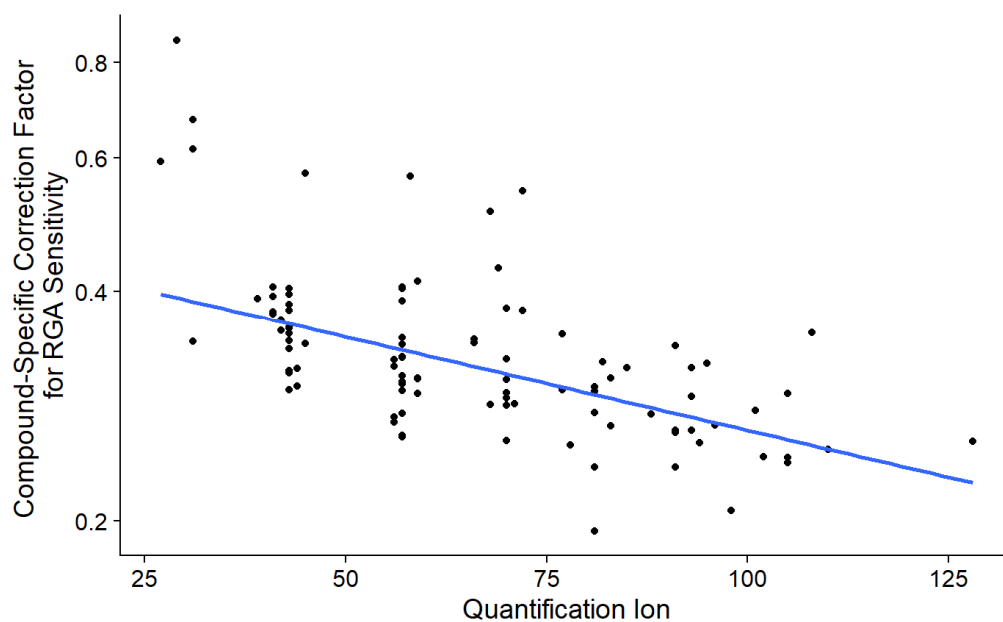

205 **Figure S15.** The log of the compound-specific correction factor for RGA sensitivity for the indoor measurements versus the quantification ion. The best fit line is used if a compound has less than six measurements remaining after Cook's distance outliers are removed.



**Table S4. Nominal times, start times, and end times of events during December 9, 2021 indoor measurements**

| Event | Nominal Time    | Start Time      | End Time        | Description                                           |
|-------|-----------------|-----------------|-----------------|-------------------------------------------------------|
| 1     | 12/9/2021 14:20 | 12/9/2021 14:20 | 12/9/2021 14:30 | Air freshener plugged in                              |
| 2     | 12/9/2021 15:10 | 12/9/2021 15:10 | 12/9/2021 15:20 | Chopped vegetables                                    |
| 3     | 12/9/2021 15:20 | 12/9/2021 15:27 | 12/9/2021 15:30 | Heated vegetable oil                                  |
| 4     | 12/9/2021 15:30 | 12/9/2021 15:30 | 12/9/2021 15:40 | Stir-fried onion, garlic, and ginger                  |
| 5     | 12/9/2021 15:40 | 12/9/2021 15:40 | 12/9/2021 15:50 | Stir-fried mushroom with black pepper                 |
| 6     | 12/9/2021 16:50 | 12/9/2021 16:56 | 12/9/2021 17:15 | Washed dishes                                         |
| 7     | 12/9/2021 17:20 | 12/9/2021 17:20 | 12/9/2021 17:32 | Cleaned floors with pine cleaner, opened kitchen door |
| 8     | 12/9/2021 17:30 | 12/9/2021 17:32 |                 | Closed kitchen door                                   |
| 9     | 12/9/2021 18:00 | 12/9/2021 18:00 |                 | Opened kitchen door                                   |
| 10    | 12/9/2021 18:10 | 12/9/2021 18:10 |                 | Closed kitchen door                                   |
| 11    | 12/9/2021 18:30 | 12/9/2021 18:30 |                 | Opened windows                                        |
| 12    | 12/9/2021 19:20 | 12/9/2021 19:20 | 12/9/2021 19:27 | Closed windows, heated oil and black pepper           |
| 13    | 12/9/2021 19:30 | 12/9/2021 19:30 | 12/9/2021 19:40 | Stir-fried onion                                      |
| 14    | 12/9/2021 19:40 | 12/9/2021 19:42 | 12/9/2021 19:50 | Stir-fried mushrooms                                  |
| 15    | 12/9/2021 20:10 | 12/9/2021 20:10 |                 | Opened windows, turned on vent fan                    |
| 16    | 12/9/2021 21:00 | 12/9/2021 21:06 |                 | Closed windows, turned off vent fan                   |
| 17    | 12/9/2021 21:40 | 12/9/2021 21:42 | 12/9/2021 21:54 | Cleaned floors with pine cleaner, opened kitchen door |

210

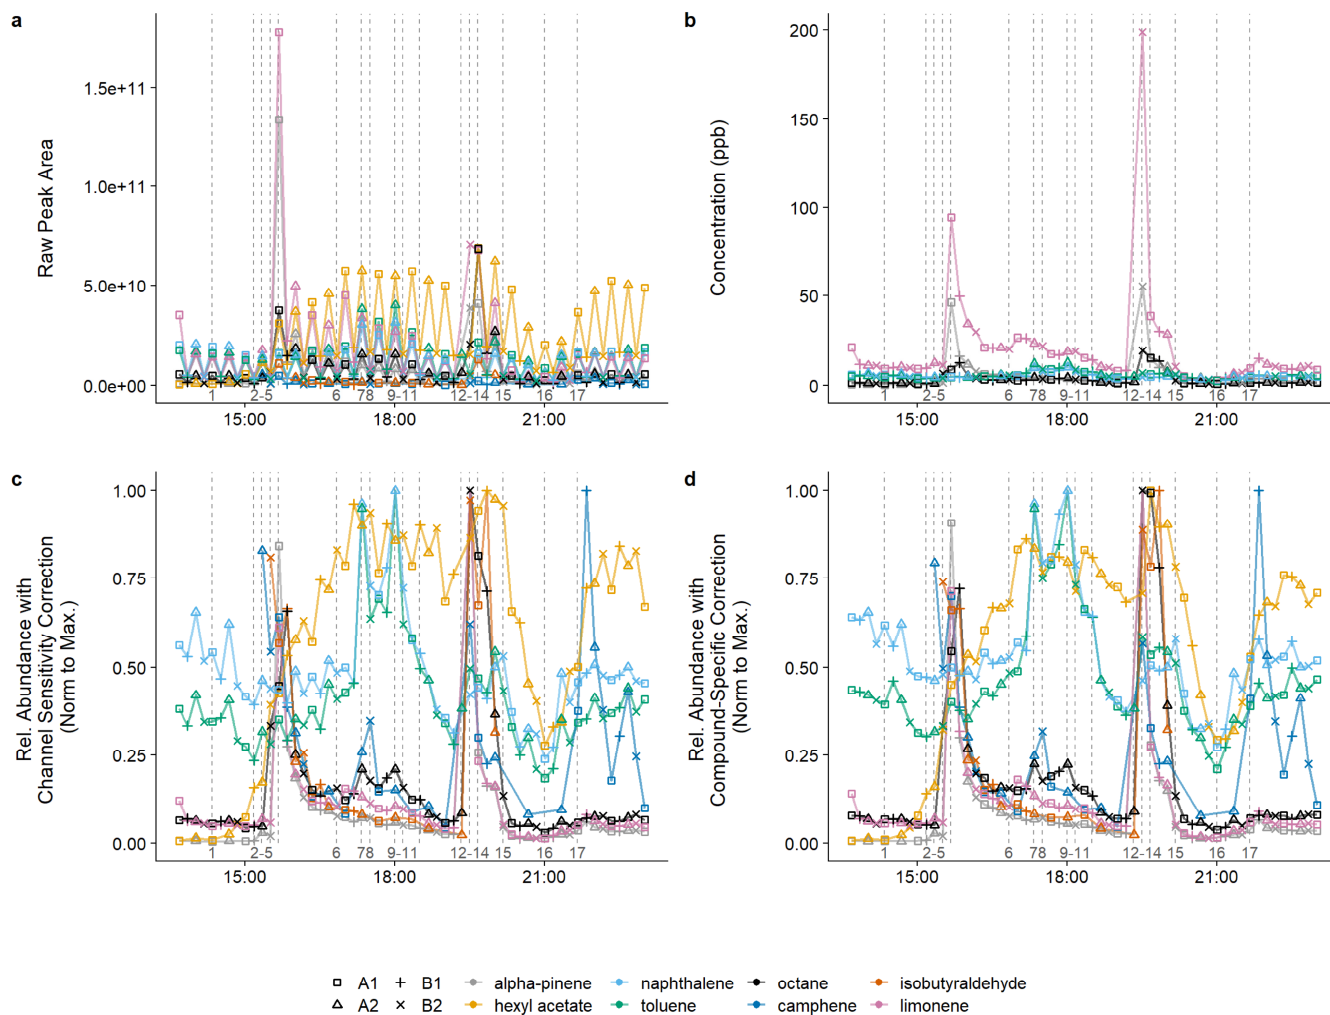

Figure S16. Timeseries of (a) raw peak area, (b) mixing ratios (ppb) calculated with power law calibration curves, (c) relative abundance with channel sensitivity factor correction and normalization to the maximum value, and (d) relative abundance with compound-specific correction and normalization to the maximum value. The vertical lines correspond to the following activities (with times rounded down to the nearest sampling time): 1 - Air freshener plugged in, 2 - Chopped vegetables, 3 - Heated vegetable oil, 4 - Stir-fried onion, garlic, and ginger, 5 - Stir-fried mushroom with black pepper, 6 - Washed dishes, 7 - Cleaned floors with pine cleaner and opened kitchen door, 8 - Closed kitchen door, 9 - Opened kitchen door, 10 - Closed kitchen door, 11 - Opened windows, 12 - Closed windows, heated oil and black pepper, 13 - Stir-fried onion, 14 - Stir-fried mushrooms, 15 - Opened windows, turned on vent fan, 16 - Closed windows, turned off vent fan, 17 - Cleaned floors with pine cleaner, opened kitchen door

215

220

## S7 Mobile measurements

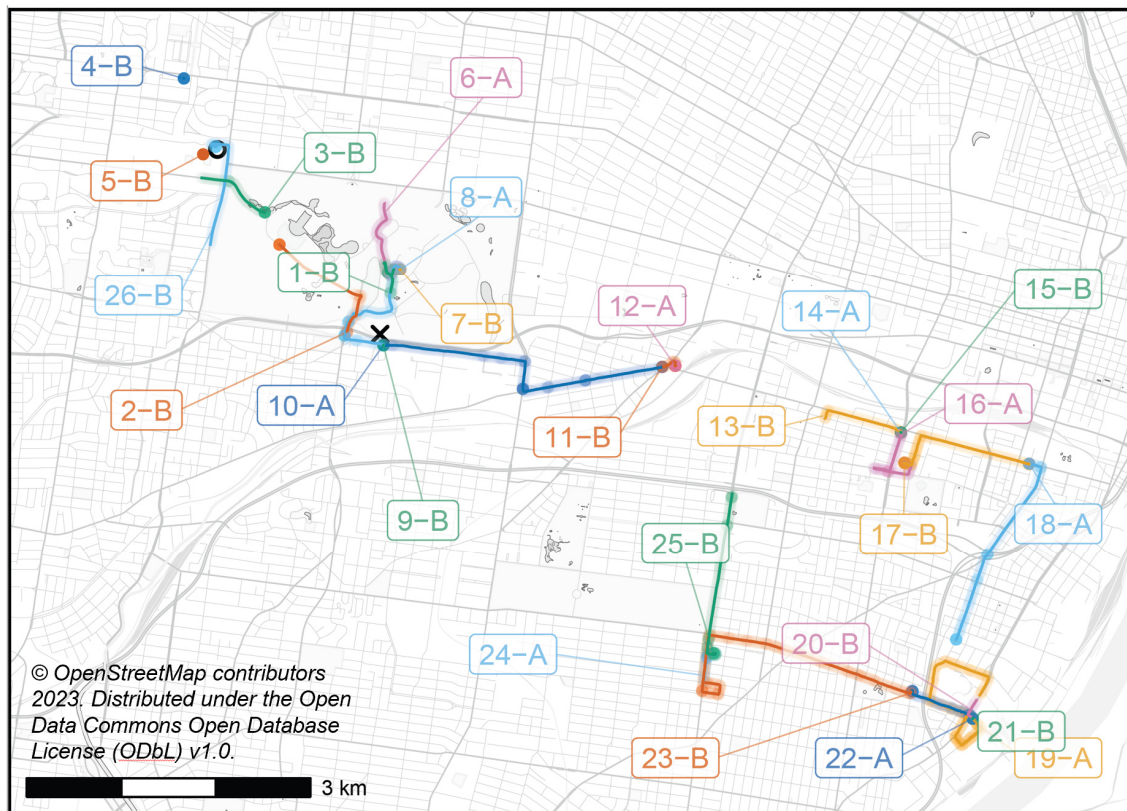

225 Figure S17. Map of locations of pilot mobile measurements in St. Louis, Missouri. The labels indicate the order of measurement  
and the RGA which acquired the MS data. Measurements 1 through 5 were from July 20, 2022, and measurements 6 through 26  
were from July 21, 2022. The thin line indicates the path of the vehicle during the measurement, and the darkness of the thicker  
line corresponds to time spent in a given location. If sample flowrate was < 20 ccm (for example, during intermittent pump  
failures on July 20), the data are omitted, and the locations are not shown. The black open circle indicates the location of  
230 supporting air quality instrumentation (including ozone). The black × indicates the position of additional supporting meteorology  
and air quality instrumentation.

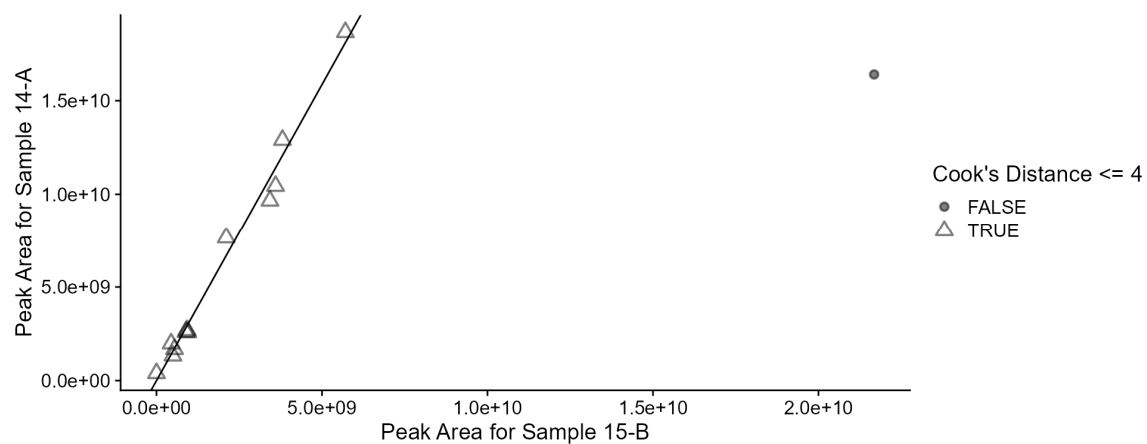

235 **Figure S18.** The correction factor for the sensitivity difference in the two RGAs was calculated as the slope of the linear fit through the origin of the peak areas for sample 14-A versus the peak areas for the same compounds for sample 15-B (slope = 3.17,  $R^2 = 0.99$ ). One point with Cook's distance > 4 was excluded.

## References

Reaxys: [www.reaxys.com](http://www.reaxys.com), last access: 26 January 2023.

- 240 Isaacman-Vanwertz, G., Sueper, D. T., Aikin, K. C., Lerner, B. M., Gilman, J. B., De Gouw, J. A., Worsnop, D. R., and Goldstein, A. H.: Automated single-ion peak fitting as an efficient approach for analyzing complex chromatographic data, *J. Chromatogr. A*, 1529, 81–92, <https://doi.org/10.1016/j.chroma.2017.11.005>, 2017.

NIST Chemistry Webbook: [webbook.nist.gov/chemistry](http://webbook.nist.gov/chemistry), last access: 26 January 2023.

- Ng, N. L., Herndon, S. C., Trimborn, A., Canagaratna, M. R., Croteau, P. L., Onasch, T. B., Sueper, D., Worsnop, D. R., 245 Zhang, Q., Sun, Y. L., and Jayne, J. T.: An Aerosol Chemical Speciation Monitor (ACSM) for Routine Monitoring of the Composition and Mass Concentrations of Ambient Aerosol, *Aerosol Sci. Technol.*, 45, 780–794, <https://doi.org/10.1080/02786826.2011.560211>, 2011.

ChemSpider: [www.chemspider.com](http://www.chemspider.com), last access: 26 January 2023.

CRC Handbook of Chemistry and Physics Online: [hcbp.chemnetbase.com](http://hcbp.chemnetbase.com).

- 250 Seborg, D. E., Mellichamp, D. A., Edgar, T. F., and Doyle, F. J.: *Process Dynamics and Control*, 3rd ed., Wiley, Hoboken, 528 pp., 2010.

Stein, S. E.: Estimating probabilities of correct identification from results of mass spectral library searches, *J. Am. Soc. Mass Spectrom.*, 5, 316–323, [https://doi.org/10.1016/1044-0305\(94\)85022-4](https://doi.org/10.1016/1044-0305(94)85022-4), 1994.
